# Supplementary material for: Solid Solutions LnxU1−xC2 with Ln = Tb, Dy, Ho, Tm, and Lu Showing Ideal Vegard Behavior
Source: MDPI journal article supplement (doi:10.3390/inorganics11120457), 2023-11-25
Supplement: s1 [file s1]

# Supporting Information

**Figure S1.** Snapshots of melting droplets of  $\text{LuC}_2$  and  $\text{TbC}_2$ .

**Table S1.** Summary of Le Bail fits and EDX analyses of  $\text{Tb}_x\text{U}_{1-x}\text{C}_2$ .

**Figure S1.1.** Lattice parameters  $a$  and  $c$  of  $\text{Tb}_x\text{U}_{1-x}\text{C}_2$  in dependence of  $x$ .

**Figure S1.2.** Sections of the synchrotron powder diffraction patterns of  $\text{Tb}_x\text{U}_{1-x}\text{C}_2$  in dependence of  $x$ .

**Figure S1.3.** Le Bail fits of  $\text{Tb}_x\text{U}_{1-x}\text{C}_2$ .

**Table S2.** Summary of Le Bail fits and EDX analyses of  $\text{Dy}_x\text{U}_{1-x}\text{C}_2$ .

**Figure S2.1.** Lattice parameters  $a$  and  $c$  of  $\text{Dy}_x\text{U}_{1-x}\text{C}_2$  in dependence of  $x$ .

**Figure S2.2.** Sections of the synchrotron powder diffraction patterns of  $\text{Dy}_x\text{U}_{1-x}\text{C}_2$  in dependence of  $x$ .

**Figure S2.3.** Le Bail fits of  $\text{Dy}_x\text{U}_{1-x}\text{C}_2$ .

**Table S3.** Summary of Le Bail fits and EDX analyses of  $\text{Ho}_x\text{U}_{1-x}\text{C}_2$ .

**Figure S3.1.** Lattice parameters  $a$  and  $c$  of  $\text{Ho}_x\text{U}_{1-x}\text{C}_2$  in dependence of  $x$ .

**Figure S3.2.** Sections of the synchrotron powder diffraction patterns of  $\text{Ho}_x\text{U}_{1-x}\text{C}_2$  in dependence of  $x$ .

**Figure S3.3.** Le Bail fits of  $\text{Ho}_x\text{U}_{1-x}\text{C}_2$ .

**Table S4.** Summary of Le Bail fits and EDX analyses of  $\text{Tm}_x\text{U}_{1-x}\text{C}_2$ .

**Figure S4.1.** Lattice parameters  $a$  and  $c$  of  $\text{Tm}_x\text{U}_{1-x}\text{C}_2$  in dependence of  $x$ .

**Figure S4.2.** Sections of the synchrotron powder diffraction patterns of  $\text{Tm}_x\text{U}_{1-x}\text{C}_2$  in dependence of  $x$ .

**Figure S4.3.** Le Bail fits of  $\text{Tm}_x\text{U}_{1-x}\text{C}_2$ .

**Table S5.** Summary of Le Bail fits on  $\text{Lu}_x\text{U}_{1-x}\text{C}_2$ .

**Figure S5.1.** Lattice parameters  $a$  and  $c$  of  $\text{Lu}_x\text{U}_{1-x}\text{C}_2$  in dependence of  $x$ .

**Figure S5.2.** Sections of the synchrotron powder diffraction patterns of  $\text{Lu}_x\text{U}_{1-x}\text{C}_2$  in dependence of  $x$ .

**Figure S5.3.** Le Bail fits of  $\text{Lu}_x\text{U}_{1-x}\text{C}_2$ .

**Table S6.** Summary of results of XANES spectra of  $\text{Tb}_x\text{U}_{1-x}\text{C}_2$ .

**Figure S6.1.** XANES spectra of  $\text{Tb}_x\text{U}_{1-x}\text{C}_2$  at the Tb- $L_{III}$  and U- $L_{III}$  edge.

**Figure S6.2.** Graphical summary of the results of the XANES spectra of  $\text{Tb}_x\text{U}_{1-x}\text{C}_2$  at the Tb- $L_{III}$  and U- $L_{III}$  edge.

**Figure S6.3.** Fits of the XANES spectra of  $\text{Tb}_x\text{U}_{1-x}\text{C}_2$  at the Tb- $L_{III}$  edge.

**Figure S6.4.** Fits of the XANES spectra of  $\text{Tb}_x\text{U}_{1-x}\text{C}_2$  at the U- $L_{III}$  edge.

**Table S7.** Summary of results of XANES spectra of  $\text{Dy}_x\text{U}_{1-x}\text{C}_2$ .

**Figure S7.1.** XANES spectra of  $\text{Dy}_x\text{U}_{1-x}\text{C}_2$  at the Dy- $L_{III}$  and U- $L_{III}$  edge.

**Figure S7.2.** Graphical summary of the results of the XANES spectra of  $\text{Dy}_x\text{U}_{1-x}\text{C}_2$  at the Dy- $L_{III}$  and U- $L_{III}$  edge.

**Figure S7.3.** Fits of the XANES spectra of  $\text{Dy}_x\text{U}_{1-x}\text{C}_2$  at the Dy- $L_{III}$  edge.

**Figure S7.4.** Fits of the XANES spectra of  $\text{Dy}_x\text{U}_{1-x}\text{C}_2$  at the U- $L_{III}$  edge.

**Table S8.** Summary of results of XANES spectra of  $\text{Ho}_x\text{U}_{1-x}\text{C}_2$ .

**Figure S8.1.** XANES spectra of  $\text{Ho}_x\text{U}_{1-x}\text{C}_2$  at the Ho- $L_{III}$  and U- $L_{III}$  edge.

**Figure S8.2.** Graphical summary of the results of the XANES spectra of  $\text{Ho}_x\text{U}_{1-x}\text{C}_2$  at the Ho- $L_{III}$  and U- $L_{III}$  edge.

**Figure S8.3.** Fits of the XANES spectra of  $\text{Ho}_x\text{U}_{1-x}\text{C}_2$  at the Ho- $L_{III}$  edge.

**Figure S8.4.** Fits of the XANES spectra of  $\text{Ho}_x\text{U}_{1-x}\text{C}_2$  at the U- $L_{III}$  edge.

**Table S9.** Summary of results of XANES spectra of  $\text{Tm}_x\text{U}_{1-x}\text{C}_2$ .

**Figure S9.1.** XANES spectra of  $\text{Tm}_x\text{U}_{1-x}\text{C}_2$  at the Tm- $L_{III}$  and U- $L_{III}$  edge.

**Figure S9.2.** Graphical summary of the results of the XANES spectra of  $\text{Tm}_x\text{U}_{1-x}\text{C}_2$  at the Tm- $L_{III}$  and U- $L_{III}$  edge.

**Figure S9.3.** Fits of the XANES spectra of  $\text{Tm}_x\text{U}_{1-x}\text{C}_2$  at the Tm- $L_{III}$  edge.

**Figure S9.4.** Fits of the XANES spectra of  $\text{Tm}_x\text{U}_{1-x}\text{C}_2$  at the U- $L_{III}$  edge.

**Table S10.** Summary of results of XANES spectra of  $\text{Lu}_x\text{U}_{1-x}\text{C}_2$ .

**Figure S10.1.** XANES spectra of  $\text{Lu}_x\text{U}_{1-x}\text{C}_2$  at the Lu- $L_{III}$  and U- $L_{III}$  edge.

**Figure S10.2.** Graphical summary of the results of the XANES spectra of  $\text{Lu}_x\text{U}_{1-x}\text{C}_2$  at the Lu- $L_{III}$  and U- $L_{III}$  edge.

**Figure S10.3.** Fits of the XANES spectra of  $\text{Lu}_x\text{U}_{1-x}\text{C}_2$  at the Lu- $L_{III}$  edge.

**Figure S10.4.** Fits of the XANES spectra of  $\text{Lu}_x\text{U}_{1-x}\text{C}_2$  at the U- $L_{III}$  edge.

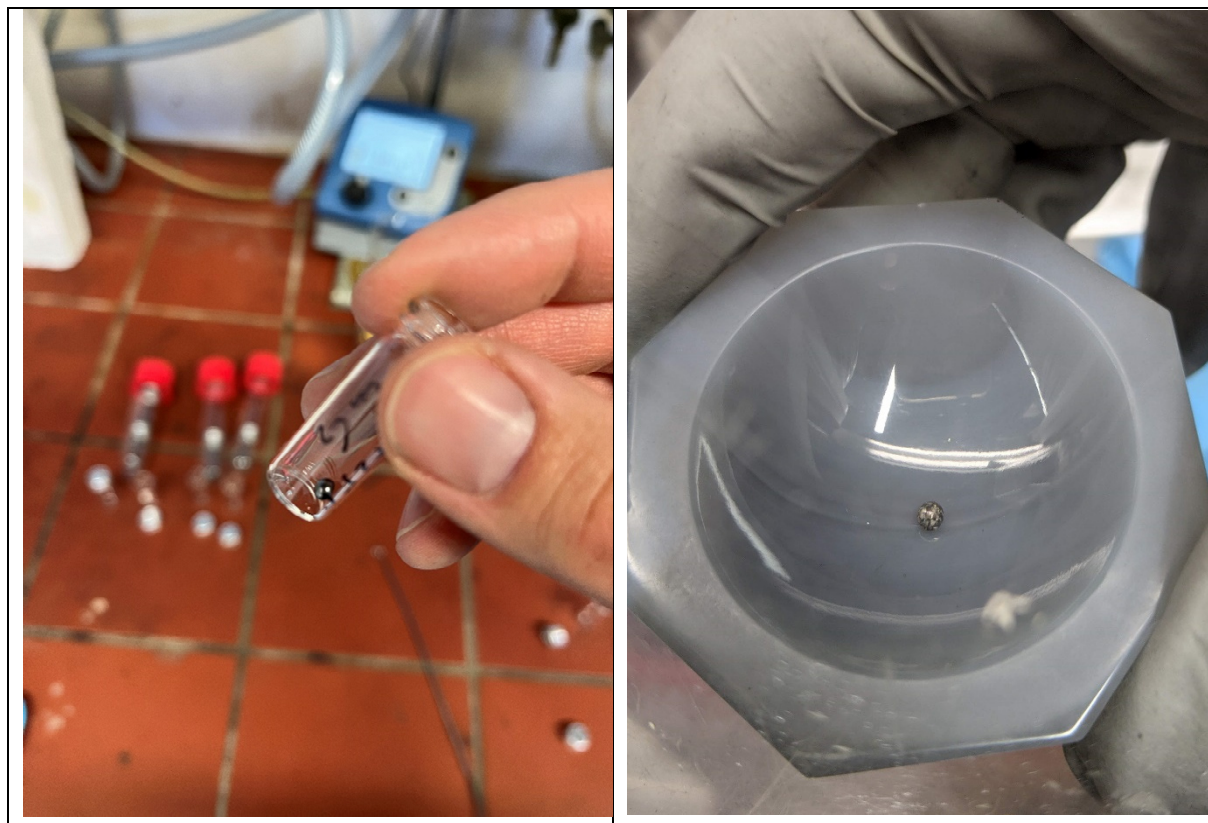

**Figure S1.** Snapshots of typical melting droplets of LuC<sub>2</sub> (left) and TbC<sub>2</sub> (right).

**Table S1.** Summary of Le Bail fits and EDX analyses of Tb<sub>x</sub>U<sub>1-x</sub>C<sub>2</sub>.

| $x_{\text{nom}} / \%$ | $x(\text{EDX}) / \%$ | $a / \text{\AA}$ | $c / \text{\AA}$ | $V / \text{\AA}^3$ | $R_p$  | $wR_p$ |
|-----------------------|----------------------|------------------|------------------|--------------------|--------|--------|
| <b>0</b>              | 0                    | 3.52052(7)       | 5.9709(2)        | 74.004(4)          | 0.0623 | 0.0908 |
| <b>10</b>             | 9.1(3)               | 3.53110(6)       | 5.9877(2)        | 74.659(3)          | 0.0636 | 0.0906 |
| <b>30</b>             | 30.7( <b>4</b> )     | 3.57187(11)      | 6.0470(3)        | 77.150(6)          | 0.0642 | 0.0874 |
| <b>50</b>             | 52.1(1)              | 3.62402(6)       | 6.12496(12)      | 80.442(3)          | 0.0406 | 0.0532 |
| <b>70</b>             | 67.2( <b>4</b> )     | 3.64713(9)       | 6.1402(2)        | 81.674(5)          | 0.0473 | 0.0665 |
| <b>90</b>             | 91.6(5)              | 3.68172(3)       | 6.19640(8)       | 83.993(2)          | 0.0223 | 0.0318 |
| <b>100</b>            | 100                  | 3.68785(3)       | 6.19854(6)       | 84.3017(14)        | 0.0176 | 0.0245 |

**Red:** estimated errors.

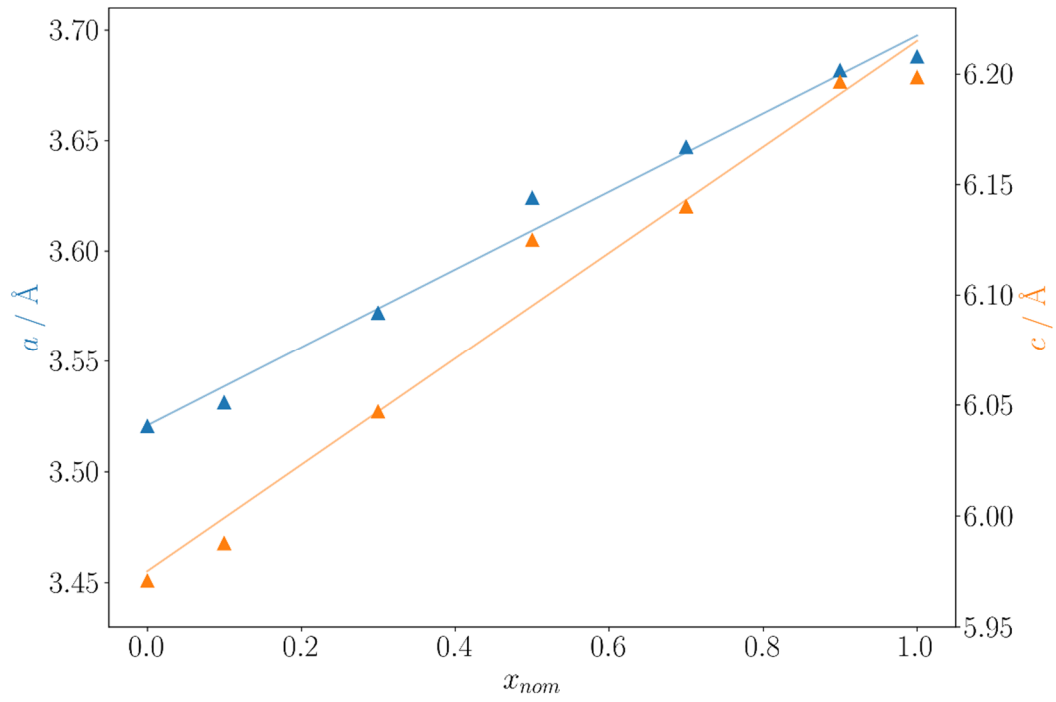

**Figure S1.1.** Lattice parameters  $a$  and  $c$  of  $\text{Tb}_x\text{U}_{1-x}\text{C}_2$  in dependence of  $x_{nom}$ . The standard deviations as obtained from Le Bail fits (Table S1) are smaller than the symbols of the plot.

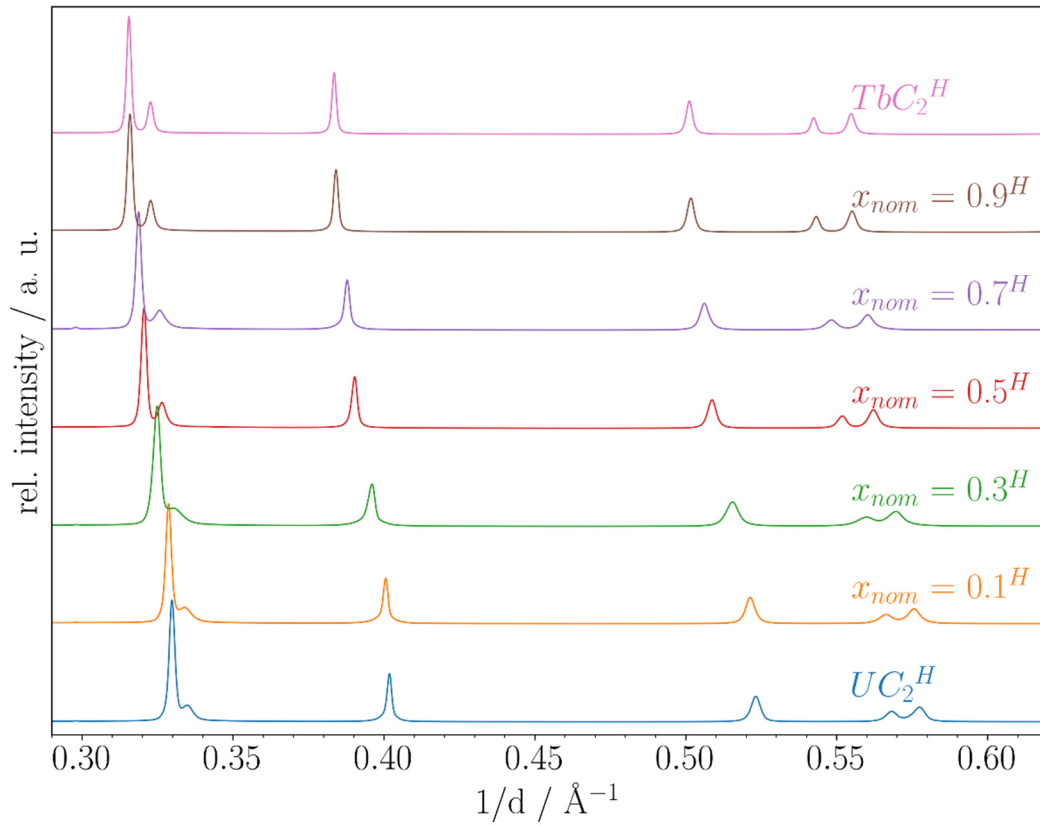

**Figure S1.2.** Sections of the synchrotron powder diffraction patterns of  $\text{Tb}_x\text{U}_{1-x}\text{C}_2$  in dependence of  $x_{nom}$ ; H:  $\lambda = 0.20735$  Å.



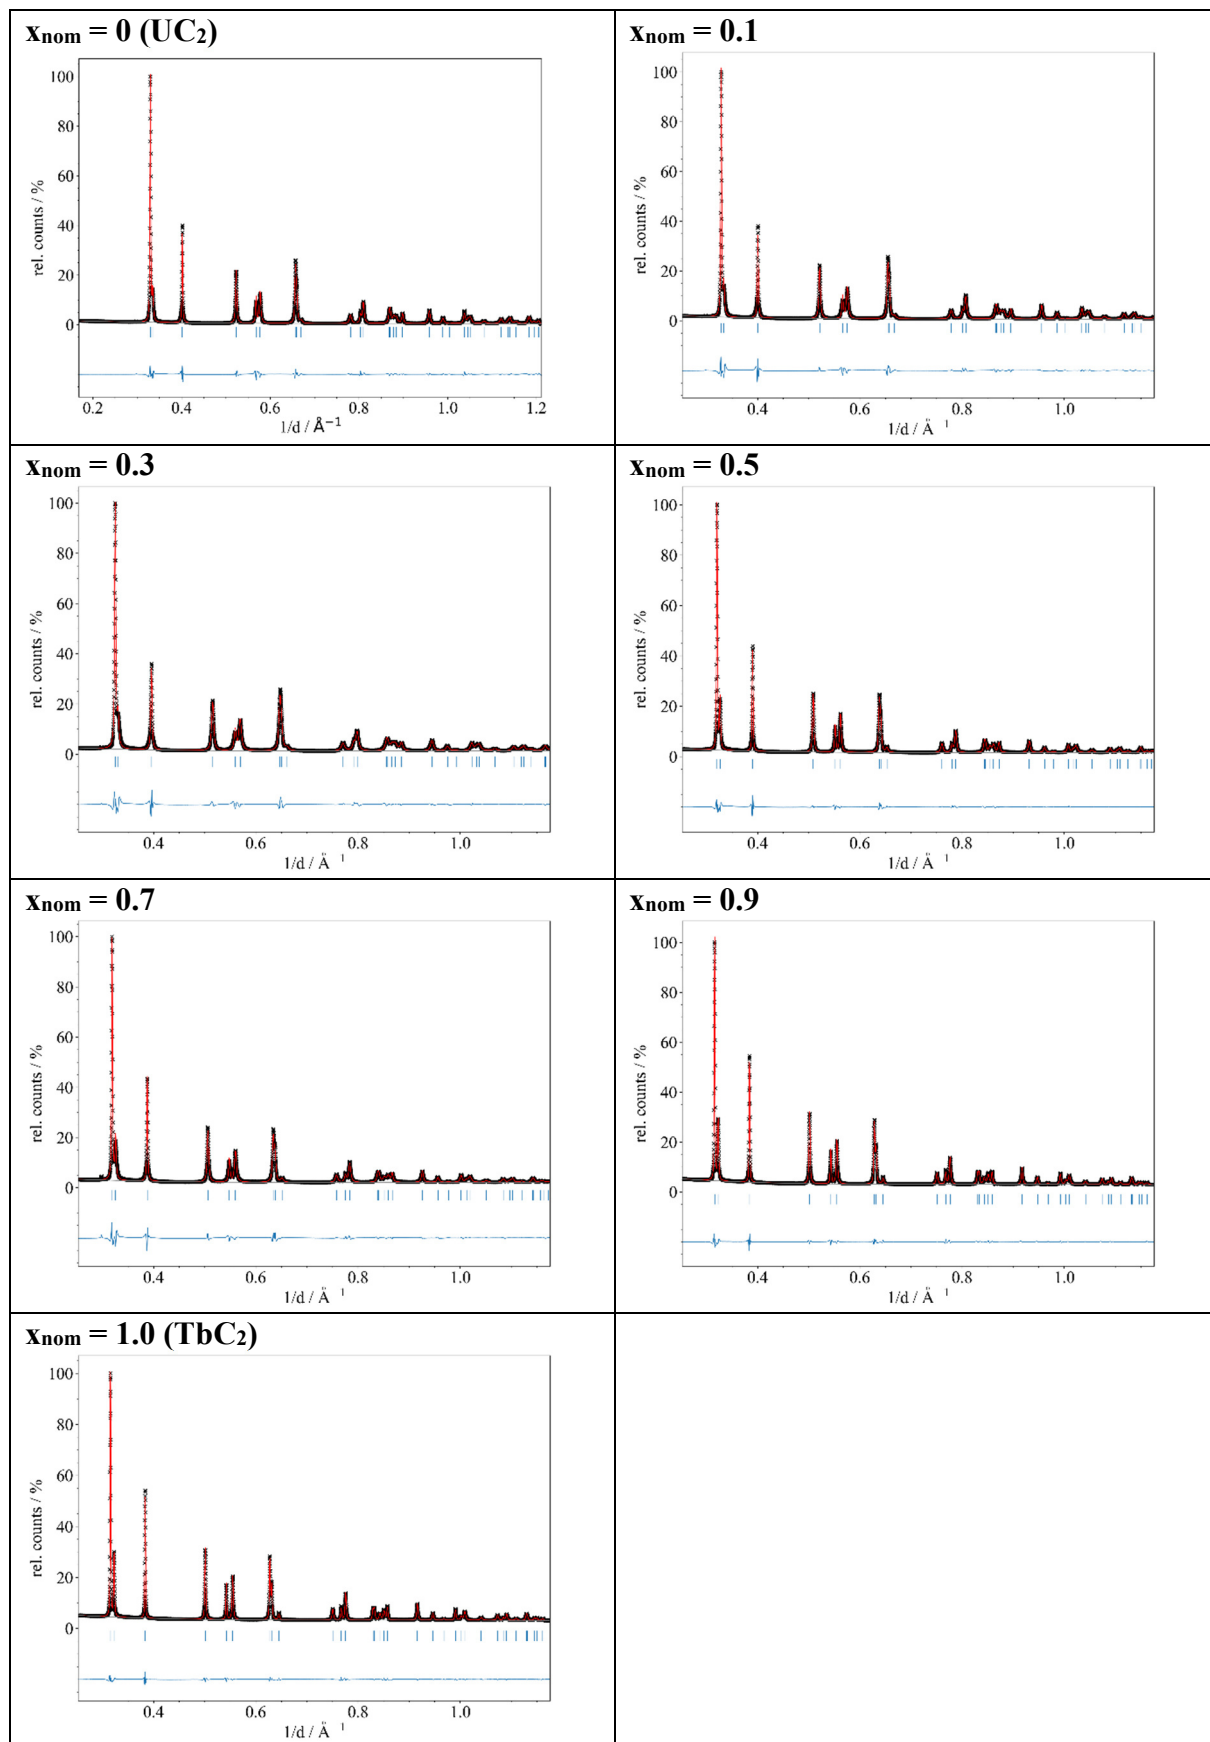

**Figure S1.3.** Le Bail fits of  $\text{Tb}_x\text{U}_{1-x}\text{C}_2$ .

**Table S2.** Summary of Le Bail fits and EDX analyses of  $\text{Dy}_x\text{U}_{1-x}\text{C}_2$ .

| $x_{\text{nom}} / \%$ | $x(\text{EDX}) / \%$ | $a / \text{\AA}$ | $c / \text{\AA}$ | $V / \text{\AA}^3$ | $R_p$  | $wR_p$ |
|-----------------------|----------------------|------------------|------------------|--------------------|--------|--------|
| 0                     | 0                    | 3.52052(7)       | 5.9709(2)        | 74.004(4)          | 0.0623 | 0.0908 |
| 10                    | 6.1(4)               | 3.52426(5)       | 5.97777(12)      | 74.247(3)          | 0.0548 | 0.0812 |
| 30                    | 21(2)                | 3.55001(5)       | 6.01574(13)      | 75.814(3)          | 0.0560 | 0.0803 |
| 50                    | 48.8(15)             | 3.59061(9)       | 6.0745(2)        | 78.315(5)          | 0.0199 | 0.0283 |
| 70                    | 60(3)                | 3.6193(1)        | 6.1073(2)        | 80.003(5)          | 0.0419 | 0.0597 |
| 90                    | 92.0(7)              | 3.65875(7)       | 6.1552(2)        | 82.397(4)          | 0.0217 | 0.0335 |
| 100                   | 100                  | 3.66855(5)       | 6.16602(12)      | 82.984(3)          | 0.0243 | 0.0376 |

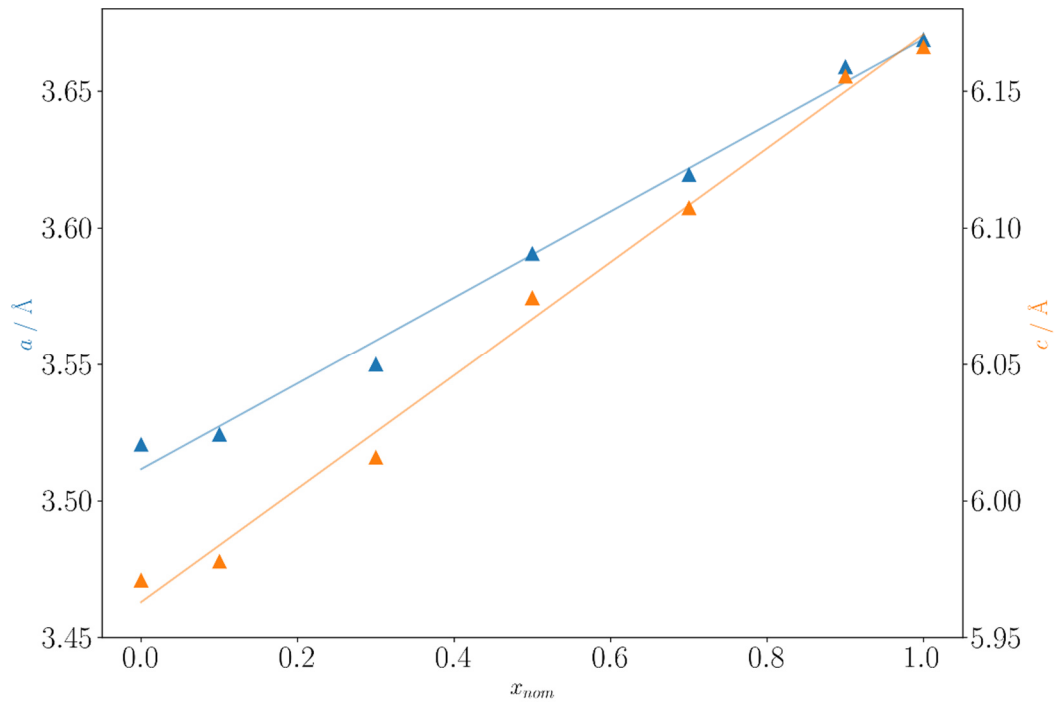**Figure S2.1.** Lattice parameters  $a$  and  $c$  of  $\text{Dy}_x\text{U}_{1-x}\text{C}_2$  in dependence of  $x_{\text{nom}}$ . The standard deviations as obtained from Le Bail fits (Table S2) are smaller than the symbols of the plot.

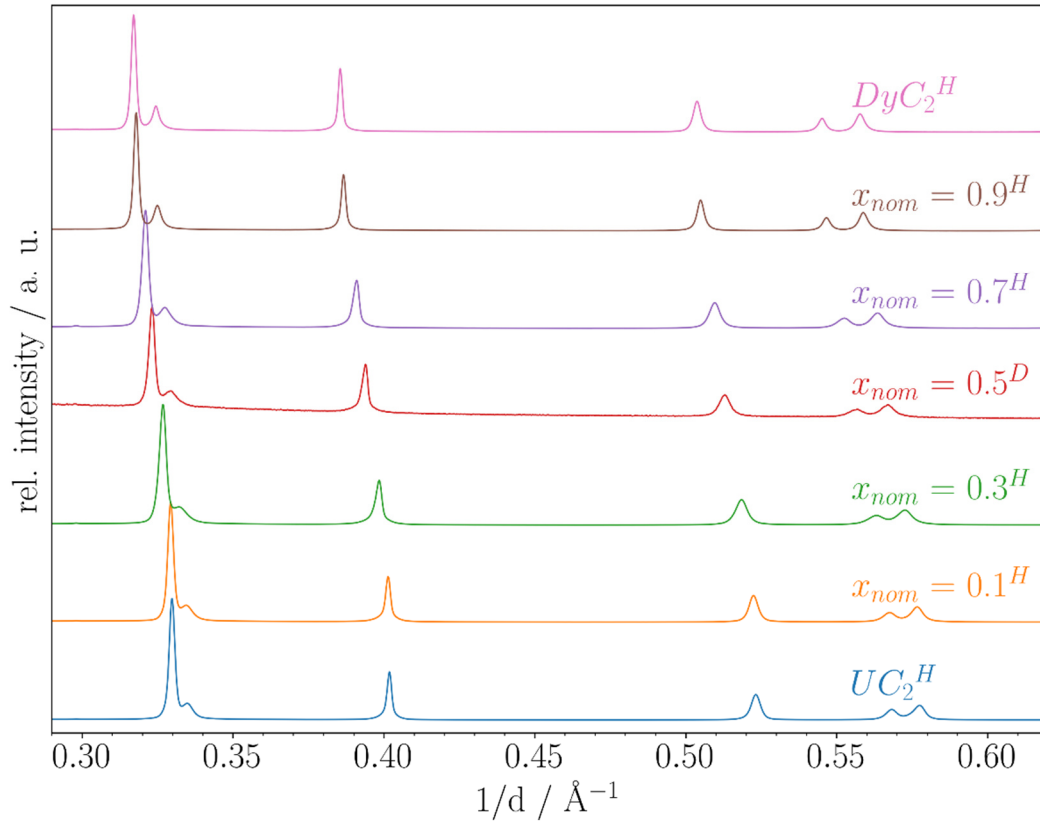

**Figure S2.2.** Sections of the synchrotron powder diffraction patterns of  $\text{Dy}_x\text{U}_{1-x}\text{C}_2$  in dependence of  $x_{\text{nom}}$ ; H:  $\lambda = 0.20735 \text{ \AA}$ , D:  $\lambda = 0.4959 \text{ \AA}$ .

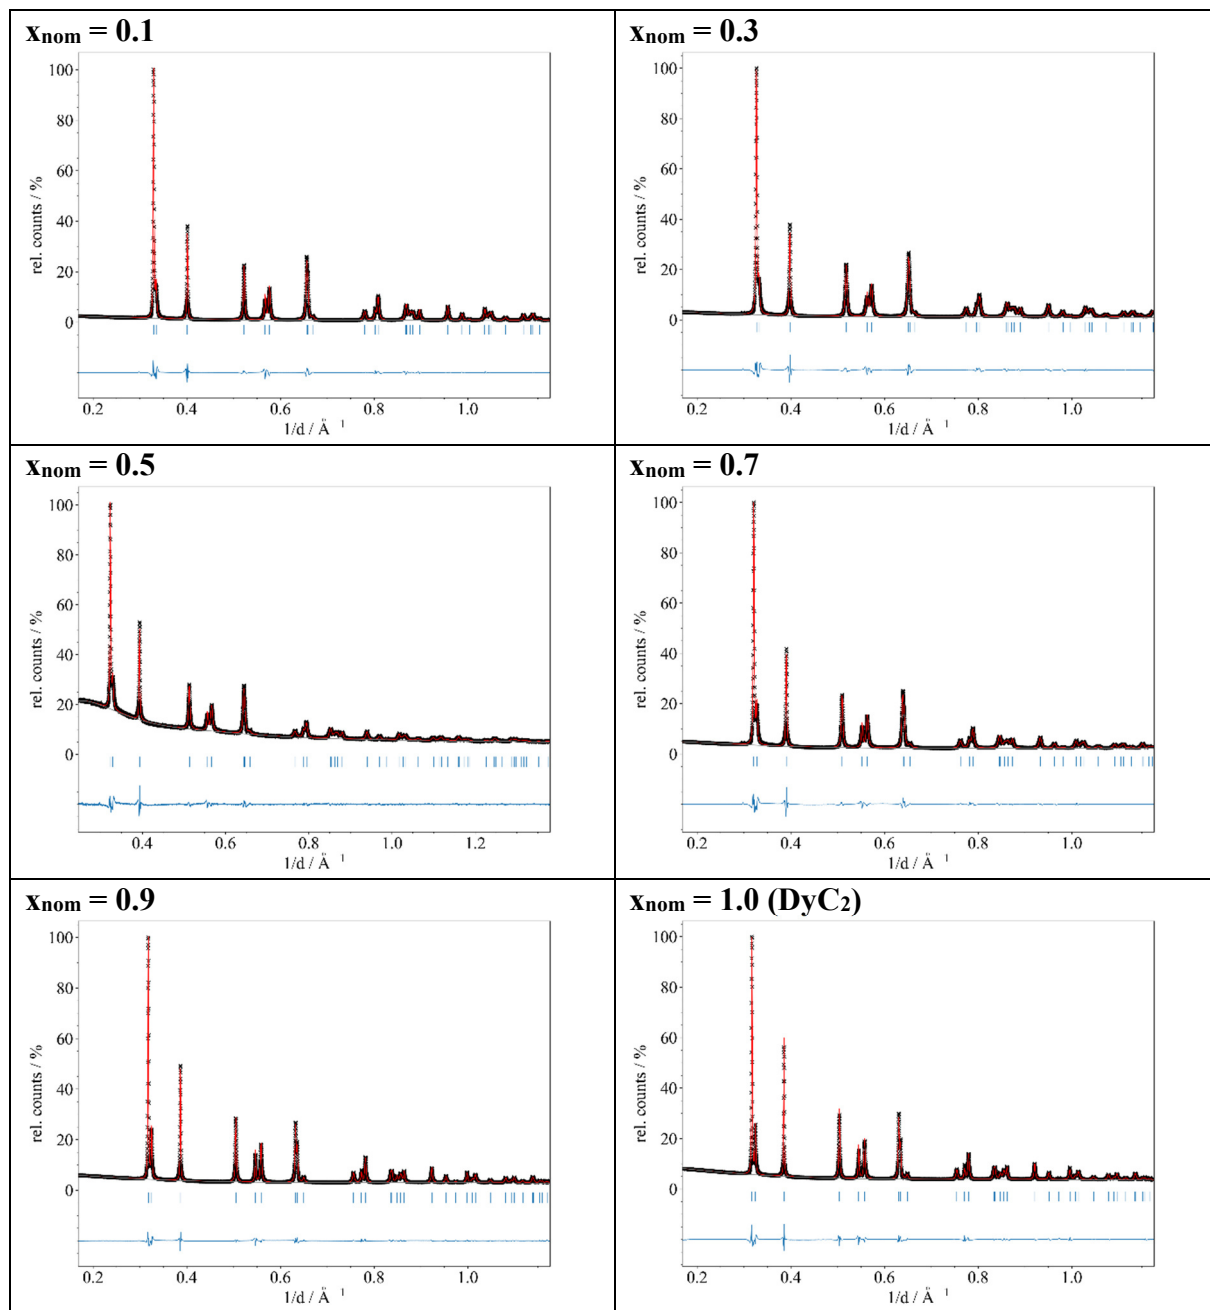

**Figure S2.3.** Le Bail fits of  $\text{Dy}_x\text{U}_{1-x}\text{C}_2$ ;  $x = 0$  ( $\text{UC}_2$ ) see Figure S1.3.

**Table S3.** Summary of Le Bail fits and EDX analyses of  $\text{Ho}_x\text{U}_{1-x}\text{C}_2$ .

| $x_{\text{nom}} / \%$ | $x(\text{EDX}) / \%$ | $a / \text{\AA}$ | $c / \text{\AA}$ | $V / \text{\AA}^3$ | $R_p$  | $wR_p$ |
|-----------------------|----------------------|------------------|------------------|--------------------|--------|--------|
| 0                     | 0                    | 3.52052(7)       | 5.9709(2)        | 74.004(4)          | 0.0623 | 0.0908 |
| 10                    | 4.3(3)               | 3.52025(5)       | 5.97541(11)      | 74.048(2)          | 0.0568 | 0.0829 |
| 30                    | 24.3(3)              | 3.54817(5)       | 6.0104(2)        | 75.668(3)          | 0.0455 | 0.0663 |
| 50                    | 45.5(4)              | 3.57982(7)       | 6.0587(2)        | 77.643(4)          | 0.0357 | 0.0499 |
| 70                    | 66.4(3)              | 3.61598(8)       | 6.1066(2)        | 79.846(4)          | 0.0347 | 0.0528 |
| 90                    | 90.7(2)              | 3.63608(4)       | 6.13339(9)       | 81.090(2)          | 0.0361 | 0.0483 |
| 100                   | 100                  | 3.64411(4)       | 6.1405(1)        | 81.543(2)          | 0.0219 | 0.0319 |

Red: estimated errors.

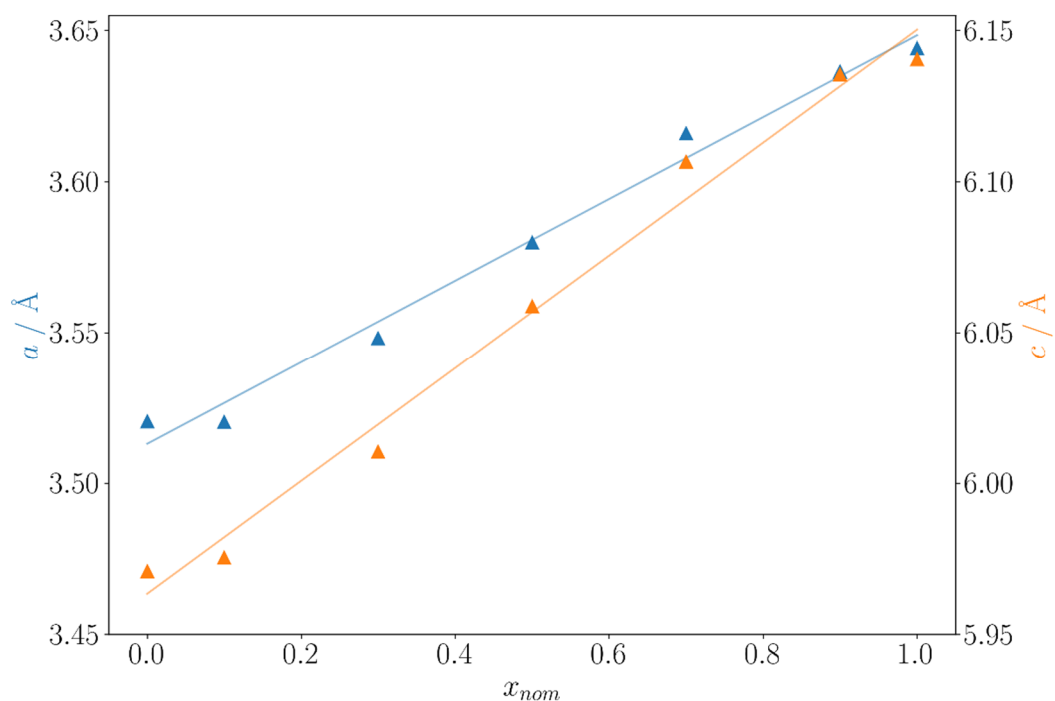**Figure S3.1.** Lattice parameters  $a$  and  $c$  of  $\text{Ho}_x\text{U}_{1-x}\text{C}_2$  in dependence of  $x_{\text{nom}}$ . The standard deviations as obtained from Le Bail fits (Table S3) are smaller than the symbols of the plot.

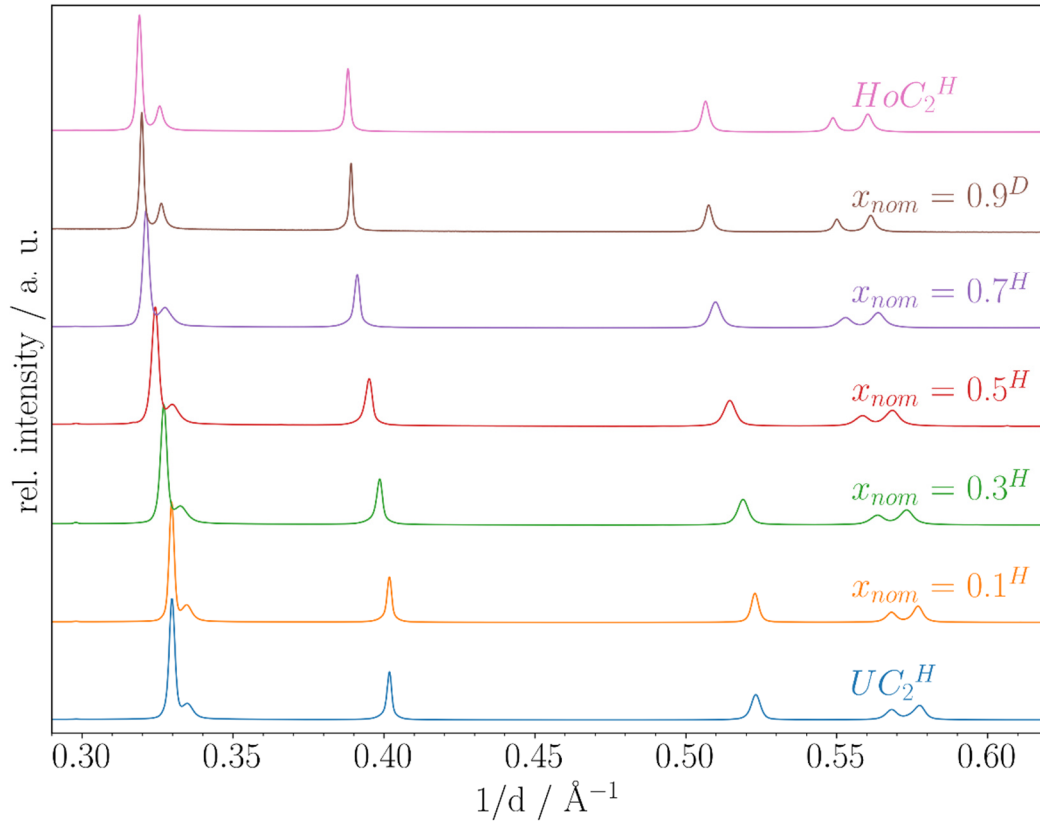

**Figure S3.2.** Sections of the synchrotron powder diffraction patterns of  $\text{Ho}_x\text{U}_{1-x}\text{C}_2$  in dependence of  $x_{\text{nom}}$ ; H:  $\lambda = 0.20735 \text{ \AA}$ ; D:  $\lambda = 0.4959 \text{ \AA}$ .

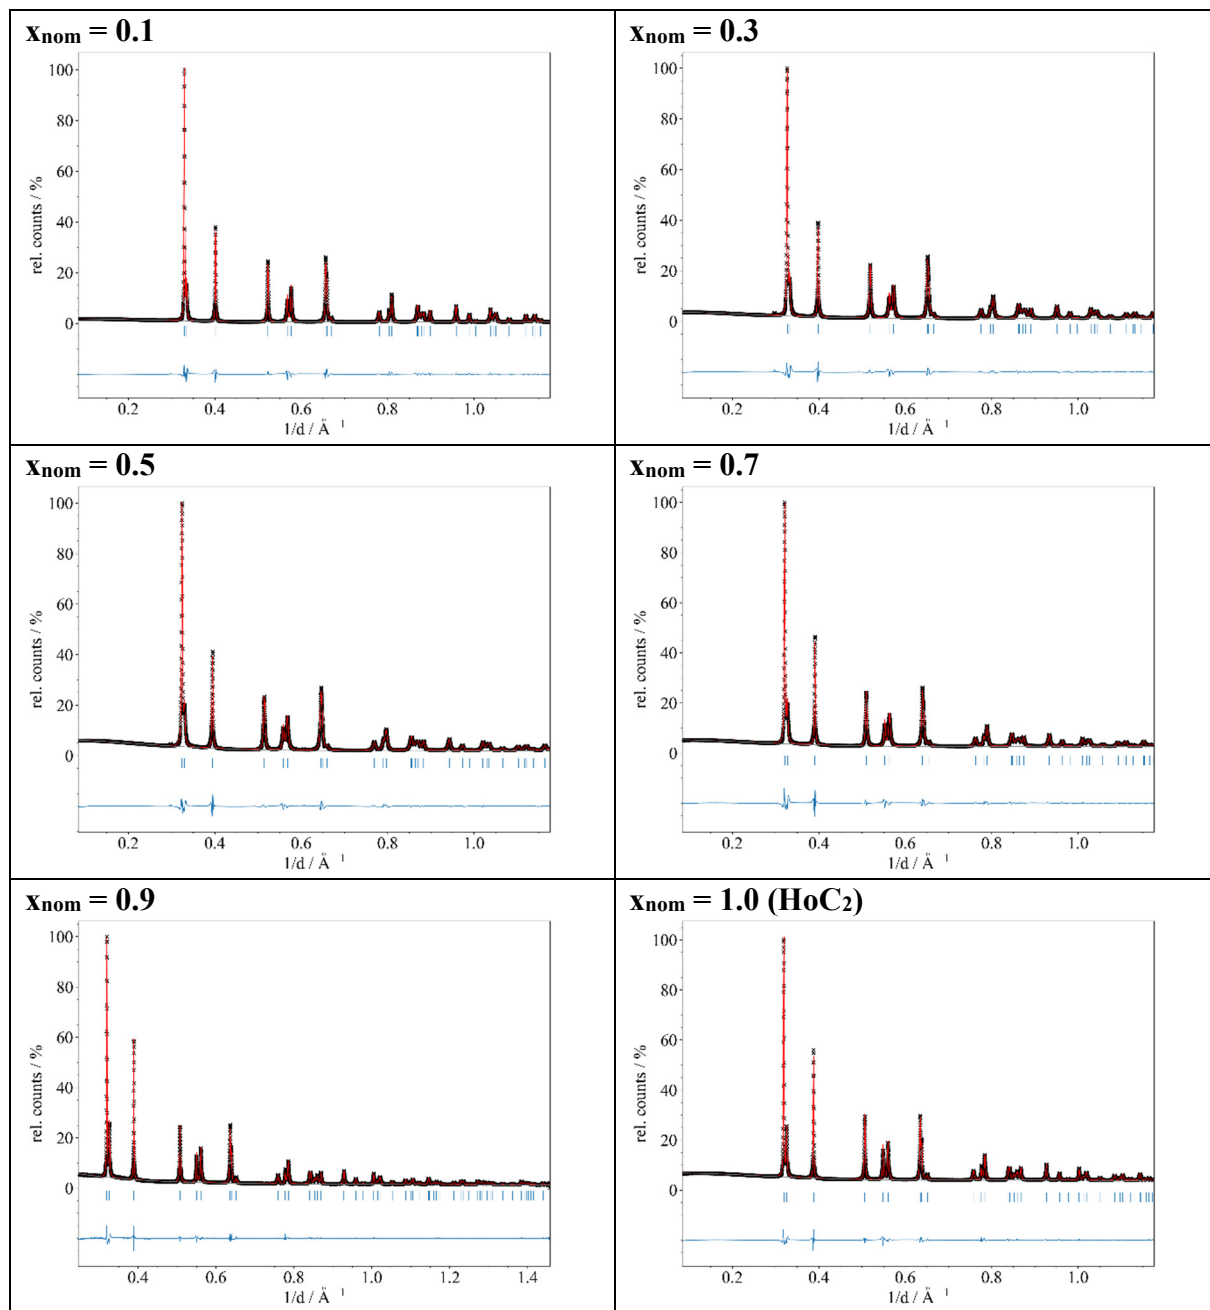

**Figure S3.3.** Le Bail fits of  $\text{Ho}_x\text{U}_{1-x}\text{C}_2$ ;  $x = 0$  ( $\text{UC}_2$ ) see Figure S1.3.

**Table S4.** Summary of Le Bail fits and EDX analyses of  $\text{Tm}_x\text{U}_{1-x}\text{C}_2$ .

| $x_{\text{nom}} / \%$ | $x(\text{EDX}) / \%$ | $a / \text{\AA}$ | $c / \text{\AA}$ | $V / \text{\AA}^3$ | $R_p$  | $wR_p$ |
|-----------------------|----------------------|------------------|------------------|--------------------|--------|--------|
| 0                     | 0                    | 3.52052(7)       | 5.9709(2)        | 74.004(4)          | 0.0623 | 0.0908 |
| 10                    | 4.6(8)               | 3.51811(5)       | 5.97120(11)      | 73.906(2)          | 0.0572 | 0.0815 |
| 30                    | 24.3(12)             | 3.53618(7)       | 5.9911(2)        | 74.916(4)          | 0.0429 | 0.0620 |
| 50                    | 38(4)                | 3.55464(7)       | 6.0056(2)        | 75.883(3)          | 0.0289 | 0.0422 |
| 70                    | 69.8(13)             | 3.57804(6)       | 6.0311(2)        | 77.213(3)          | 0.0243 | 0.0337 |
| 90                    | 90.6(2)              | 3.59694(9)       | 6.0451(2)        | 78.212(5)          | 0.0315 | 0.0484 |
| 100                   | 100                  | 3.6043(1)        | 6.0543(2)        | 78.653(5)          | 0.0600 | 0.0828 |

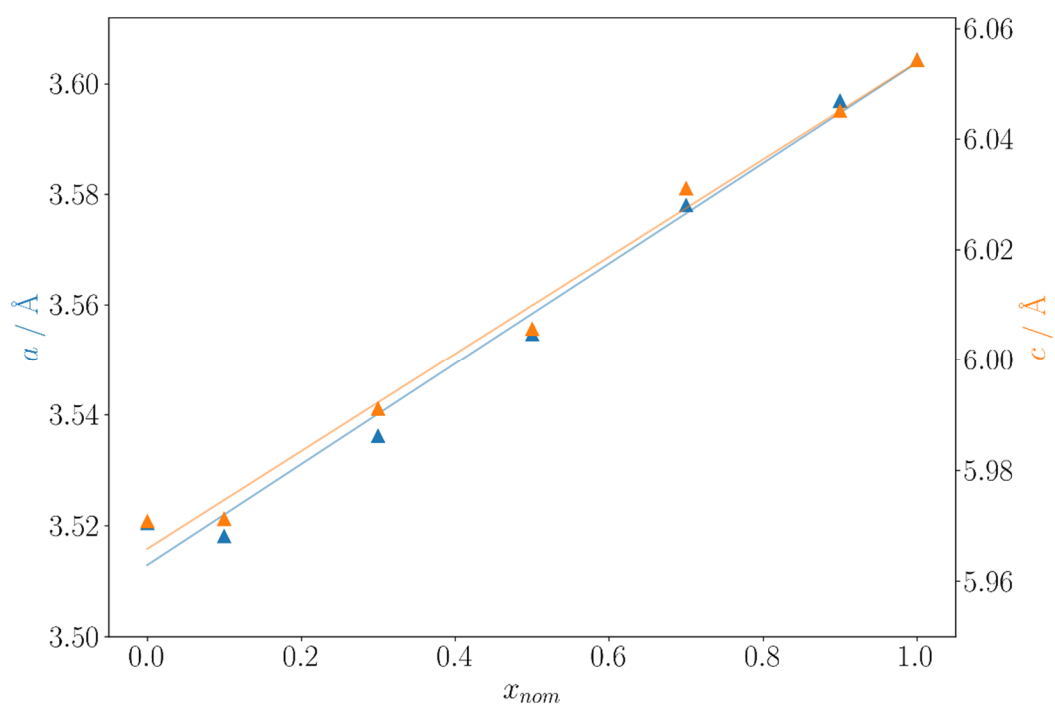**Figure S4.1.** Lattice parameters  $a$  and  $c$  of  $\text{Tm}_x\text{U}_{1-x}\text{C}_2$  in dependence of  $x_{\text{nom}}$ . The standard deviations as obtained from Le Bail fits (Table S4) are smaller than the symbols of the plot.



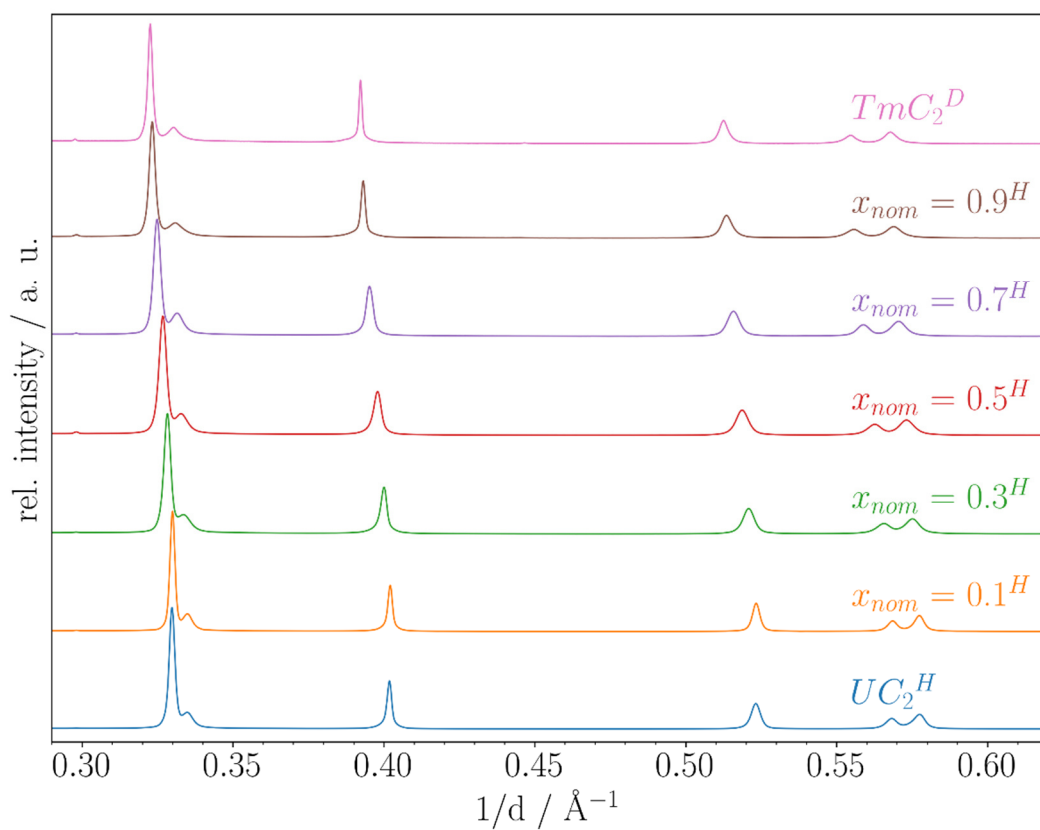

**Figure S4.2.** Sections of the synchrotron powder diffraction patterns of  $\text{Tm}_x\text{U}_{1-x}\text{C}_2$  in dependence of  $x_{\text{nom}}$ ; H:  $\lambda = 0.20735 \text{ \AA}$ ; D:  $\lambda = 0.4959 \text{ \AA}$ .

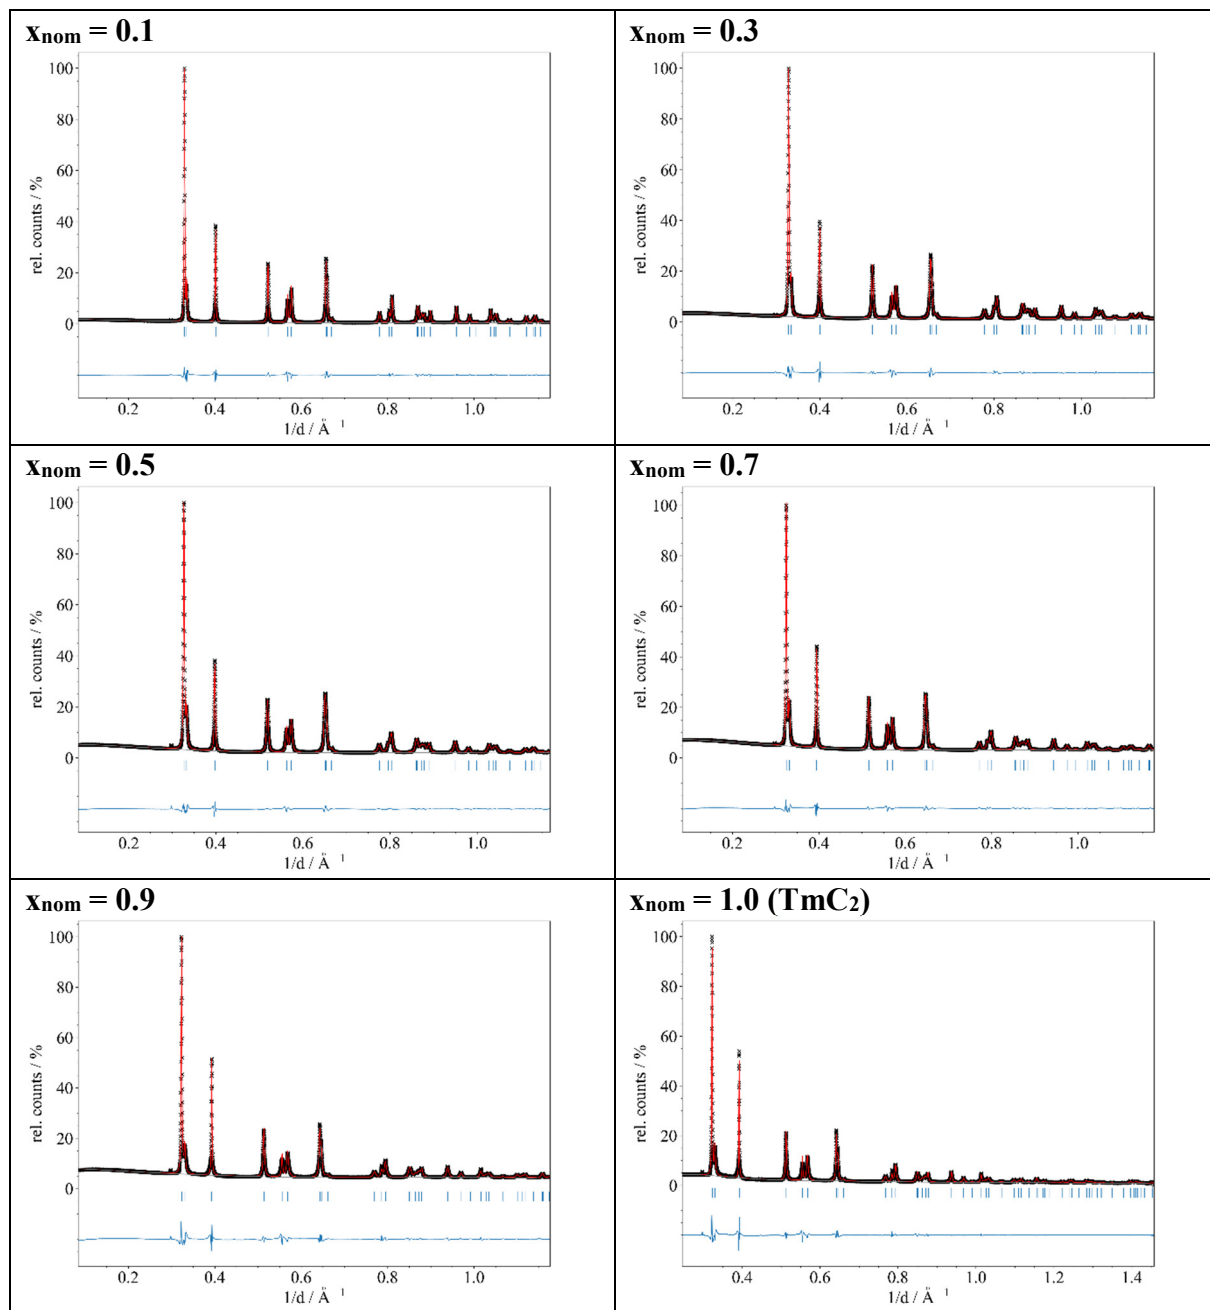

**Figure S4.3.** Le Bail fits of  $\text{Tm}_x\text{U}_{1-x}\text{C}_2$ ;  $x = 0$  ( $\text{UC}_2$ ) see Figure S1.3.

**Table S5.** Summary of Le Bail fits of  $\text{Lu}_x\text{U}_{1-x}\text{C}_2$ .

| $x_{\text{nom}} / \%$ | $a / \text{\AA}$ | $c / \text{\AA}$ | $V / \text{\AA}^3$ | $R_p$  | $wR_p$ |
|-----------------------|------------------|------------------|--------------------|--------|--------|
| 0                     | 3.52052(7)       | 5.9709(2)        | 74.004(4)          | 0.0623 | 0.0908 |
| 12.5                  | 3.52260(6)       | 5.9771(2)        | 74.168(3)          | 0.0157 | 0.0209 |
| 25                    | 3.53470(9)       | 5.99199(12)      | 74.865(4)          | 0.0233 | 0.0318 |
| 37.5                  | 3.53921(7)       | 5.9878(2)        | 75.003(4)          | 0.0178 | 0.0228 |
| 50                    | 3.54563(7)       | 5.9923(2)        | 75.333(4)          | 0.0232 | 0.0293 |
| 62.5                  | 3.55392(7)       | 5.9931(2)        | 75.695(4)          | 0.0317 | 0.0252 |
| 75                    | 3.55617(5)       | 5.9632(2)        | 75.412(3)          | 0.0446 | 0.0352 |
| 87.5                  | 3.55993(11)      | 5.9872(3)        | 75.877(6)          | 0.0516 | 0.0365 |
| 100*                  |                  |                  |                    | 0.0411 | 0.0285 |

\*  $\text{Lu}_4\text{C}_7$  was obtained ( $P2_1/c$ ) with  $a = 3.62973(8) \text{ \AA}$ ,  $b = 13.4827(3) \text{ \AA}$ ,  $c = 6.3590(2) \text{ \AA}$ ,  $\beta = 103.533(1)^\circ$ ,  $V = 302.56(1) \text{ \AA}^3$

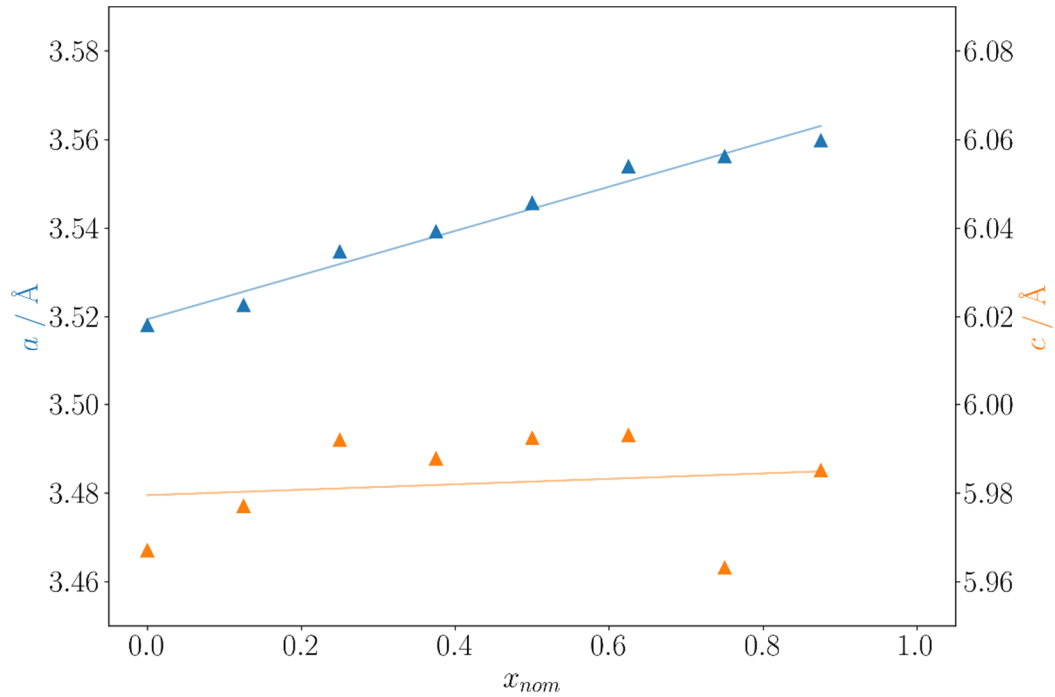**Figure S5.1.** Lattice parameters  $a$  and  $c$  of  $\text{Lu}_x\text{U}_{1-x}\text{C}_2$  in dependence of nominal  $x$ . The standard deviations as obtained from Le Bail fits (Table S5) are smaller than the symbols of the plot.

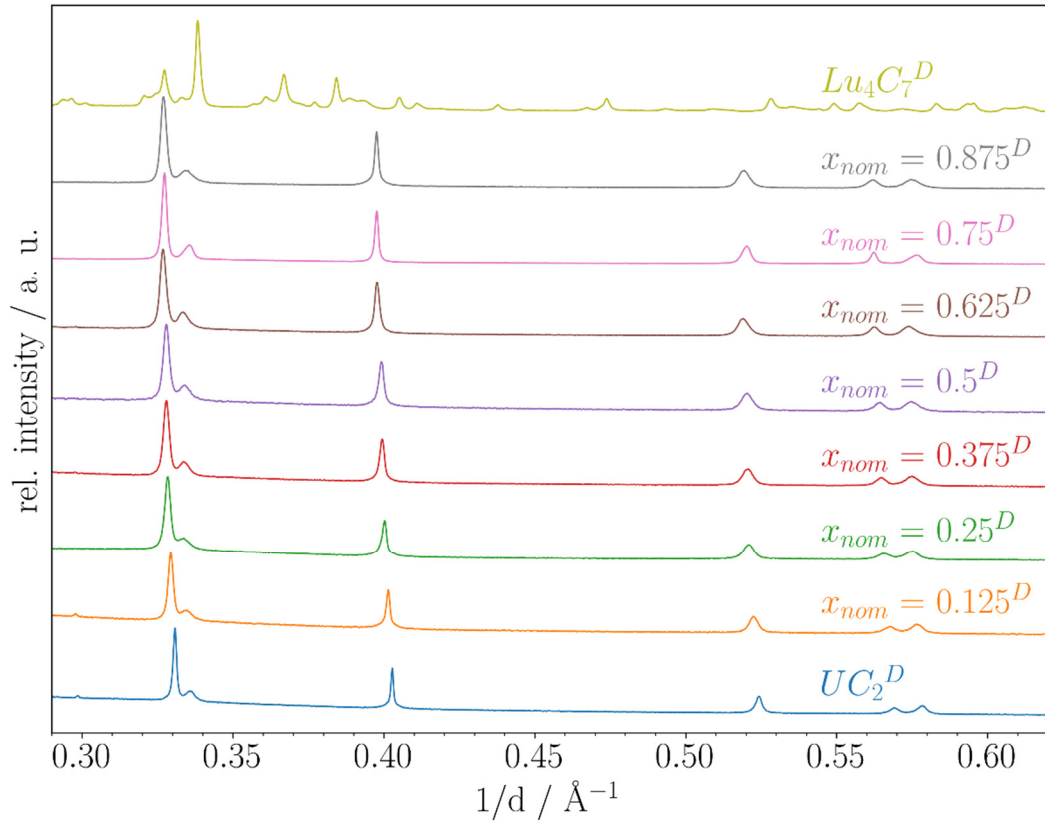

**Figure S5.2.** Sections of the synchrotron powder diffraction patterns of  $\text{Lu}_x\text{U}_{1-x}\text{C}_2$  in dependence of  $x_{\text{nom}}$ ; D:  $\lambda = 0.4959 \text{ \AA}$ .

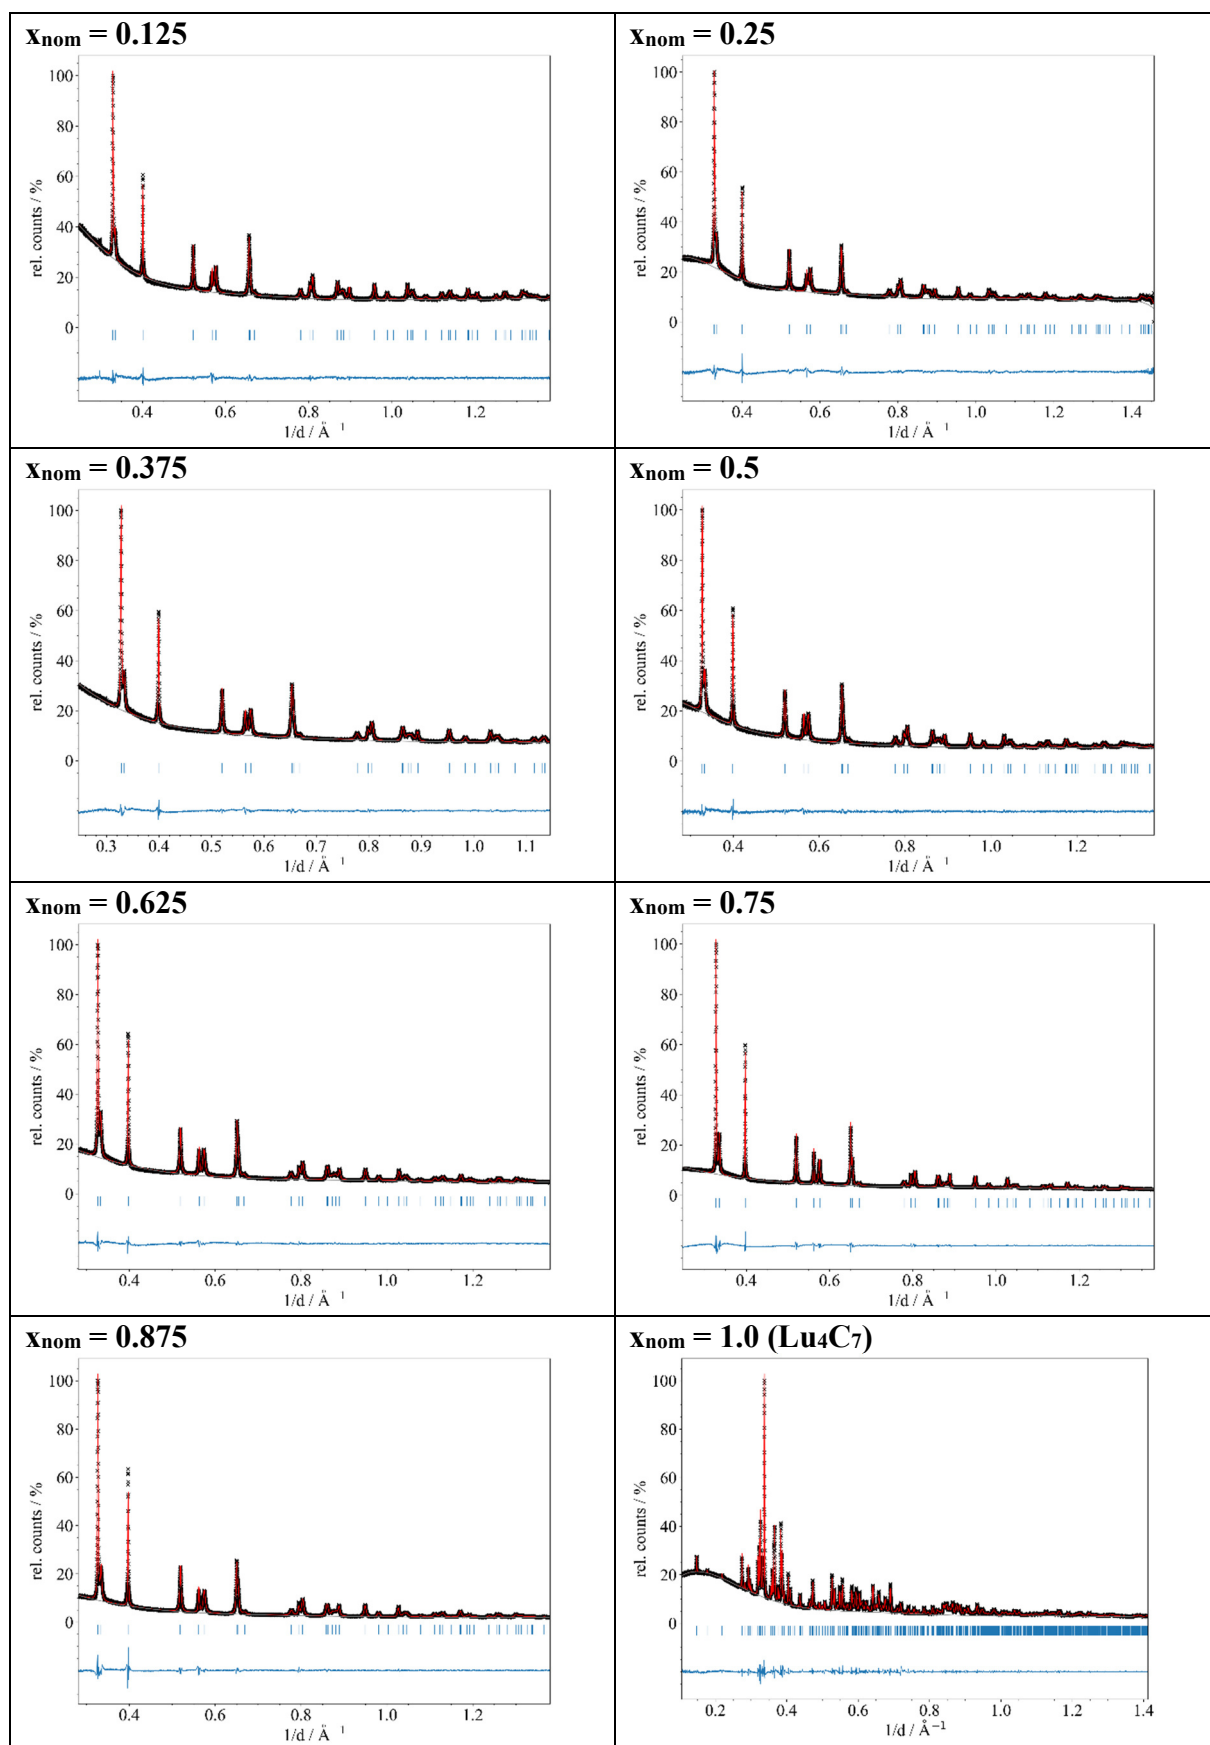

**Figure S5.3.** Le Bail fits of  $\text{Lu}_x\text{U}_{1-x}\text{C}_2$ ;  $x = 0$  ( $\text{UC}_2$ ) see Figure S1.3.

**Table S6.** Summary of results of XANES spectra of Tb<sub>x</sub>U<sub>1-x</sub>C<sub>2</sub>.

| <b>x<sub>nom</sub> / %</b> | <b>x(EDX) / %</b> | <b>A<sub>WL</sub> / a.u.</b>     |                                 | <b>E<sub>WL</sub> / eV</b>       |                                 | <b>E<sub>0</sub> / eV</b>        |                                 |
|----------------------------|-------------------|----------------------------------|---------------------------------|----------------------------------|---------------------------------|----------------------------------|---------------------------------|
|                            |                   | <b>Tb-<i>L</i><sub>III</sub></b> | <b>U-<i>L</i><sub>III</sub></b> | <b>Tb-<i>L</i><sub>III</sub></b> | <b>U-<i>L</i><sub>III</sub></b> | <b>Tb-<i>L</i><sub>III</sub></b> | <b>U-<i>L</i><sub>III</sub></b> |
| <b>0</b>                   | 0                 | -                                | 5.56                            | -                                | 17175.65                        | -                                | 17167.2                         |
| <b>10</b>                  | 9.1(3)            | -                                | 4.36                            | -                                | 17175.54                        | -                                | 17166.2                         |
| <b>30</b>                  | 30.7(4)           | 11.34                            | 5.91                            | 7519.79                          | 17175.55                        | 7516.08                          | 17168.1                         |
| <b>50</b>                  | 52.1(1)           | 8.30                             | 6.02                            | 7519.65                          | 17175.30                        | 7515.45                          | 17167.7                         |
| <b>70</b>                  | 67.2(4)           | 5.94                             | 6.70                            | 7519.54                          | 17175.08                        | 7514.55                          | 17168.6                         |
| <b>90</b>                  | 91.6(5)           | 3.75                             | 7.12                            | 7519.91                          | 17174.68                        | 7514.17                          | 17168.7                         |
| <b>100</b>                 | 100               | 4.15                             | -                               | 7519.87                          | -                               | 7514.47                          | -                               |

Red: estimated errors.

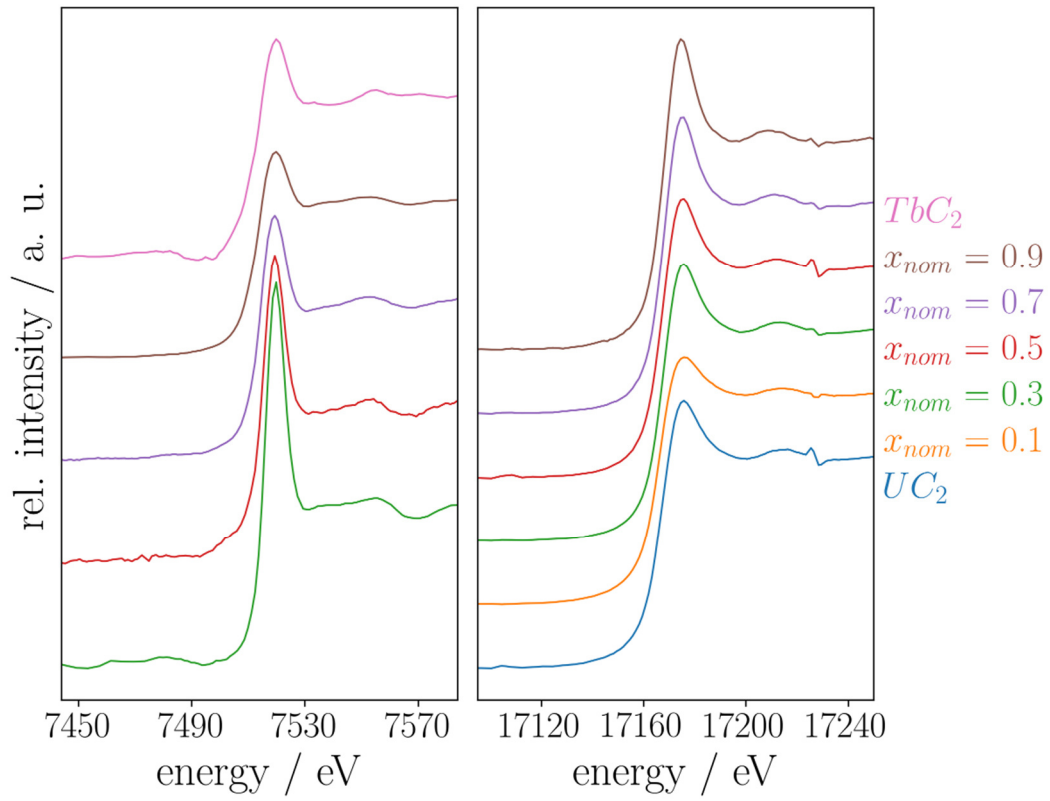

**Figure S6.1.** XANES spectra of  $\text{Tb}_x\text{U}_{1-x}\text{C}_2$  at the  $\text{Tb-L}_{III}$  (left) and  $\text{U-L}_{III}$  edge (right).

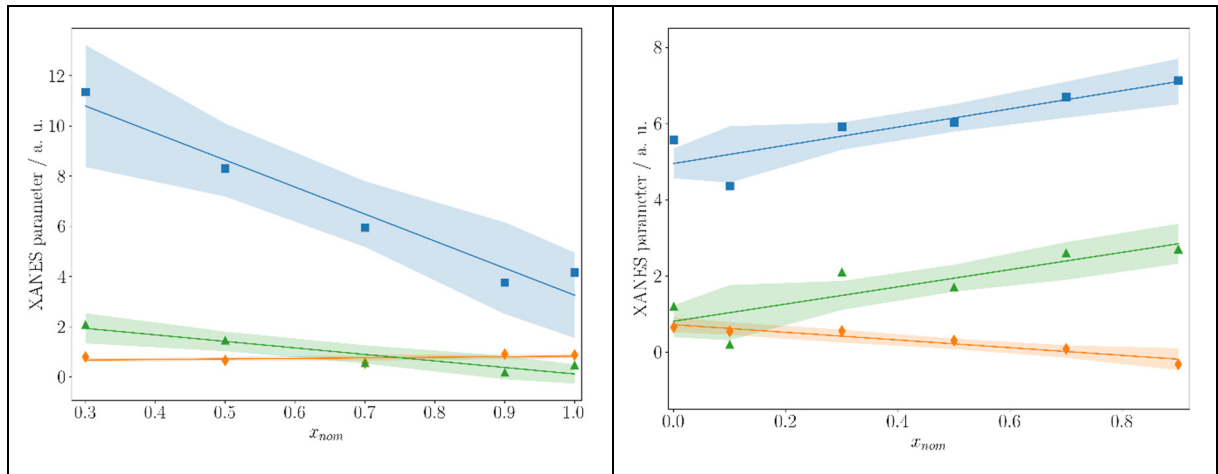

**Figure S6.2.** Graphical summary of the results of the XANES spectra of  $\text{Tb}_x\text{U}_{1-x}\text{C}_2$  at the  $\text{Tb-L}_{III}$  (left) and  $\text{U-L}_{III}$  edge (right); blue: area of white line ( $A_{WL}$ ), green: energy of white line ( $E_{WL}$ ), orange: energy of absorption edge ( $E_0$ ). The shaded areas correspond to confidence intervals of 68 %.

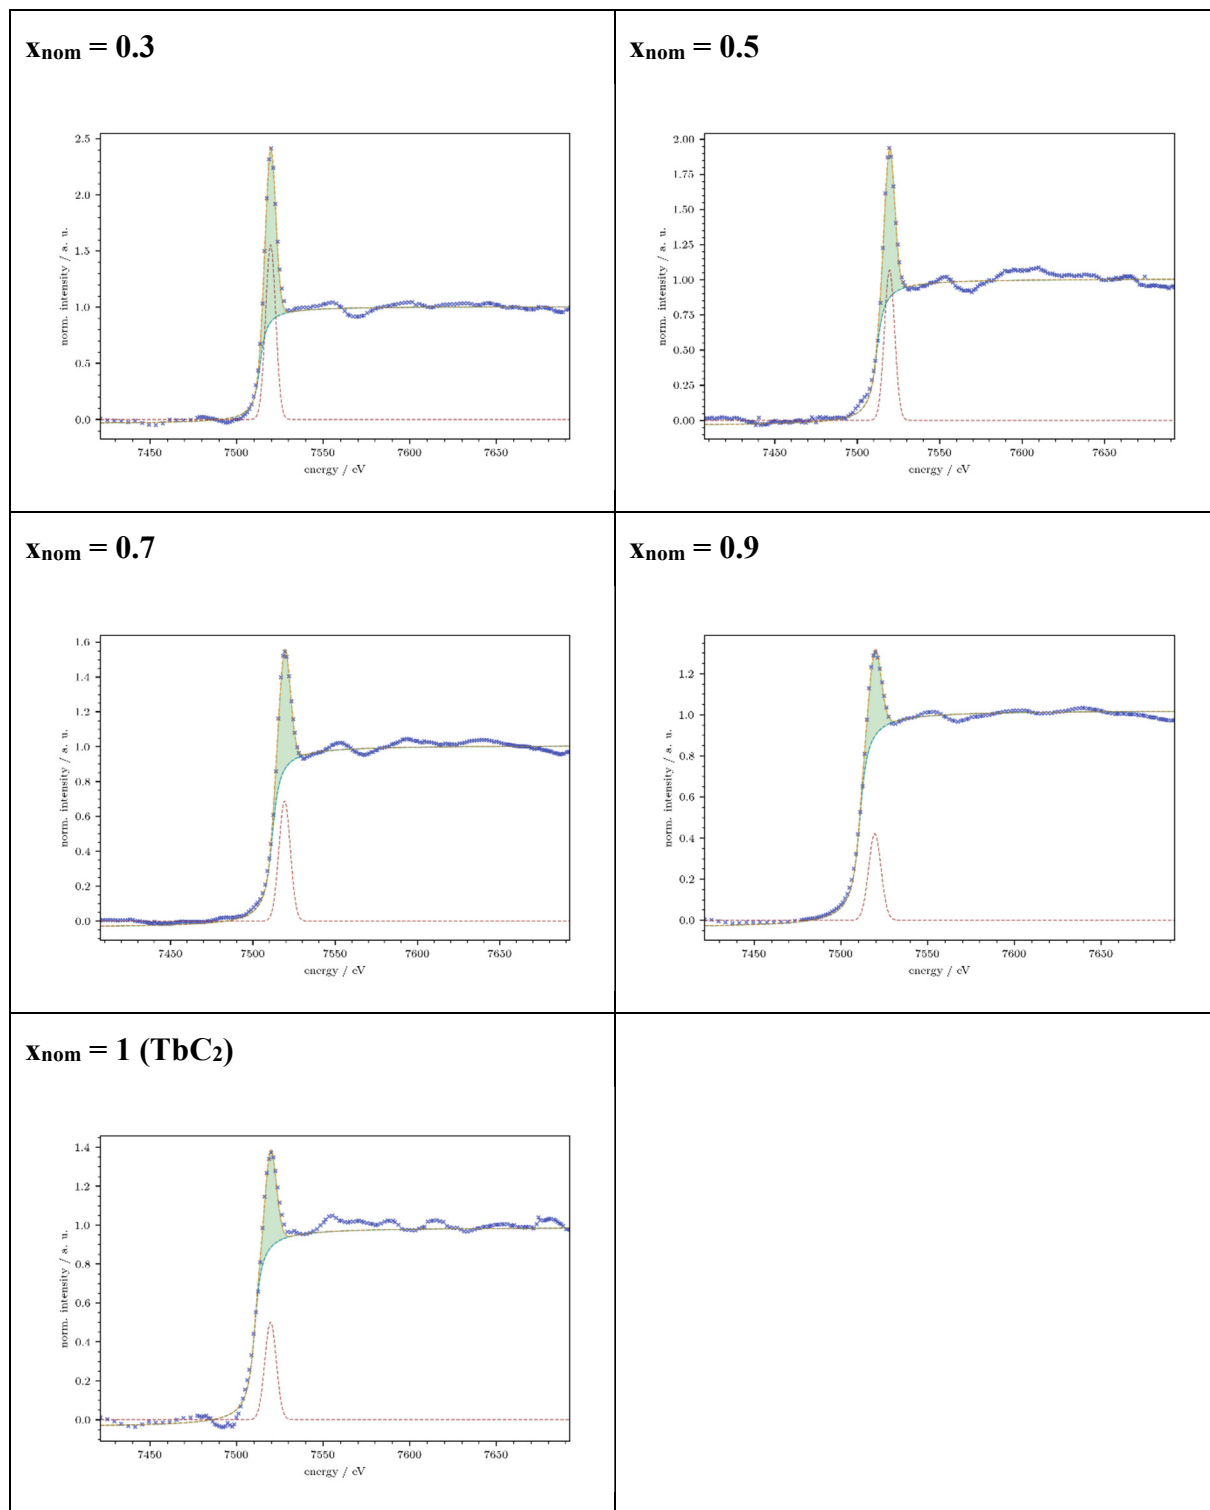

**Figure S6.3.** Fits of the XANES spectra of Tb<sub>x</sub>U<sub>1-x</sub>C<sub>2</sub> at the Tb-L<sub>III</sub> edge.



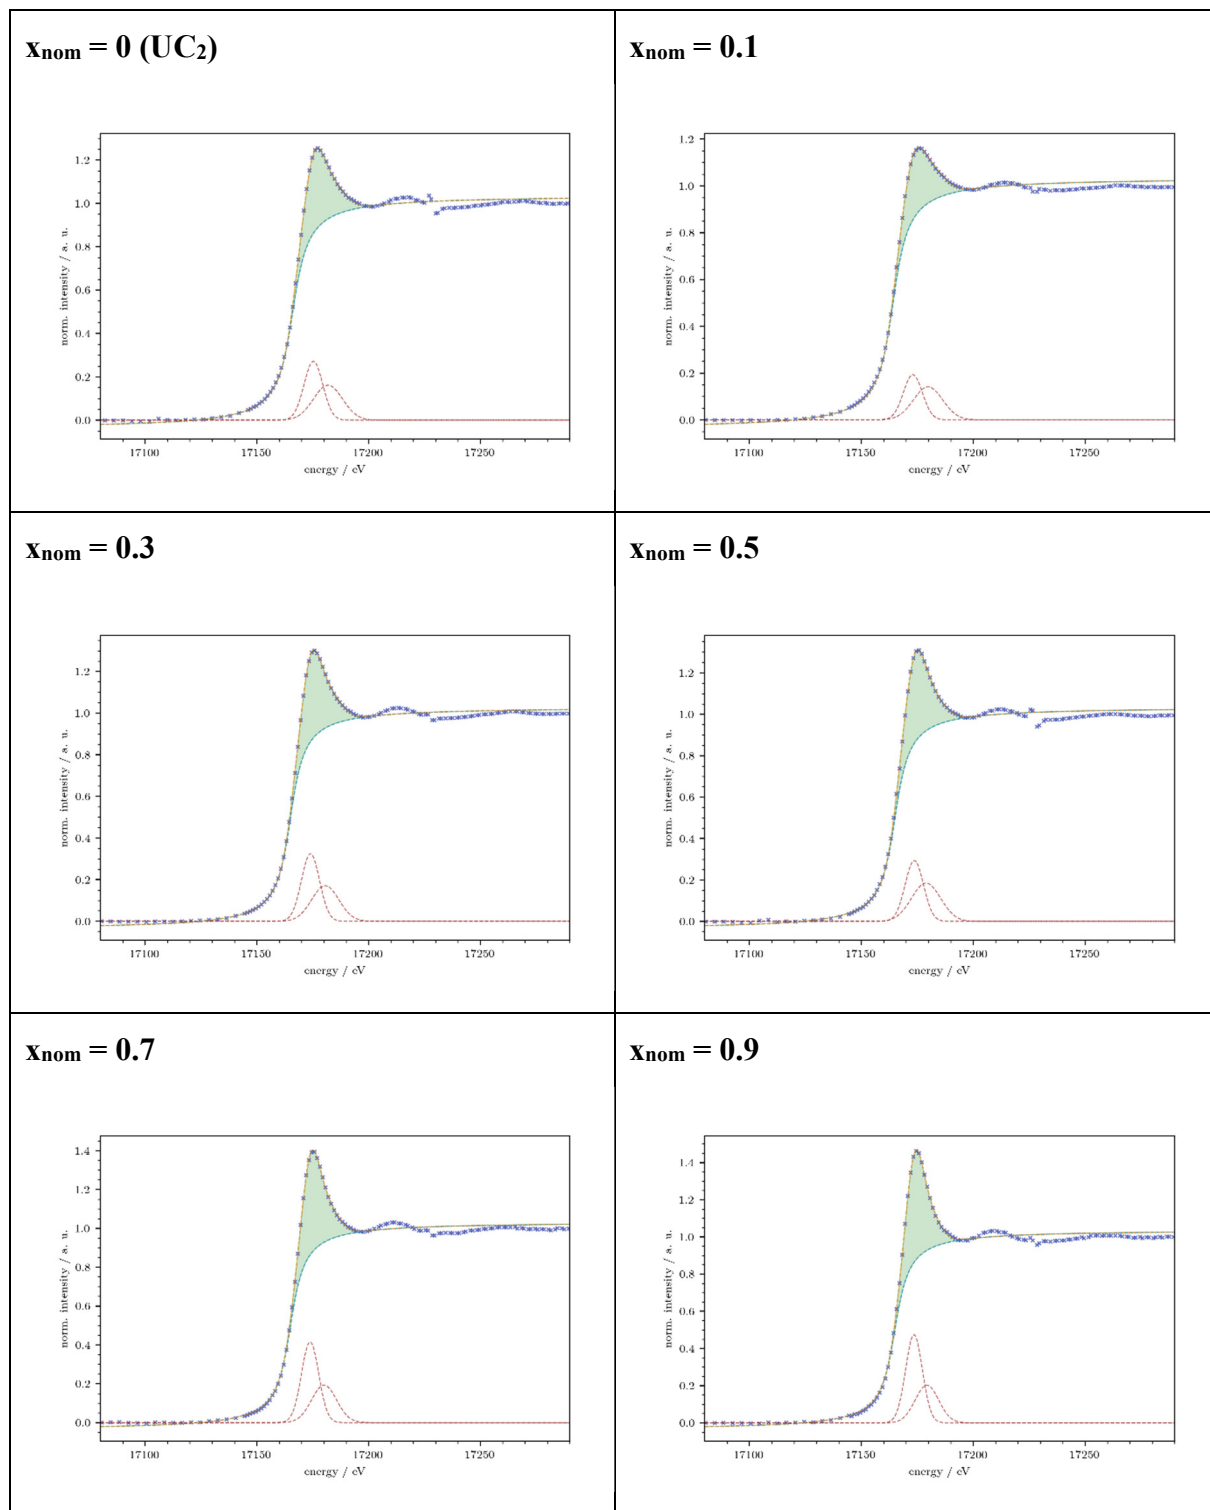

**Figure S6.4.** Fits of the XANES spectra of  $\text{Tb}_x\text{U}_{1-x}\text{C}_2$  at the U- $L_{III}$  edge.

**Table S7.** Summary of results of XANES spectra of Dy<sub>x</sub>U<sub>1-x</sub>C<sub>2</sub>.

| <b>x<sub>nom</sub> / %</b> | <b>x(EDX) / %</b> | <b>A<sub>WL</sub> / a.u.</b> |                          | <b>E<sub>WL</sub> / eV</b> |                          | <b>E<sub>0</sub> / eV</b> |                          |
|----------------------------|-------------------|------------------------------|--------------------------|----------------------------|--------------------------|---------------------------|--------------------------|
|                            |                   | <b>Dy-L<sub>III</sub></b>    | <b>U-L<sub>III</sub></b> | <b>Dy-L<sub>III</sub></b>  | <b>U-L<sub>III</sub></b> | <b>Dy-L<sub>III</sub></b> | <b>U-L<sub>III</sub></b> |
| <b>0</b>                   | 0                 | -                            | 5.56                     | -                          | 17175.65                 | -                         | 17167.2                  |
| <b>10</b>                  | 6.1(4)            | 5.39                         | 5.24                     | 7796.33                    | 17175.72                 | 7793.09                   | 17167.2                  |
| <b>30</b>                  | 21(2)             | 14.86                        | 5.87                     | 7796.31                    | 17175.64                 | 7792.52                   | 17167.9                  |
| <b>50</b>                  | 48.8(15)          | 9.04                         | 9.88                     | 7796.50                    | 17177.45                 | 7792.52                   | 17171.9                  |
| <b>70</b>                  | 60(3)             | 4.41                         | 7.77                     | 7796.48                    | 17176.32                 | 7790.63                   | 17170.8                  |
| <b>90</b>                  | 92.0(7)           | 4.44                         | 6.89                     | 7796.23                    | 17174.72                 | 7790.33                   | 17168.4                  |
| <b>100</b>                 | 100               | 6.19                         | -                        | 7796.23                    | -                        | 7791.24                   | -                        |

**Red:** estimated errors.

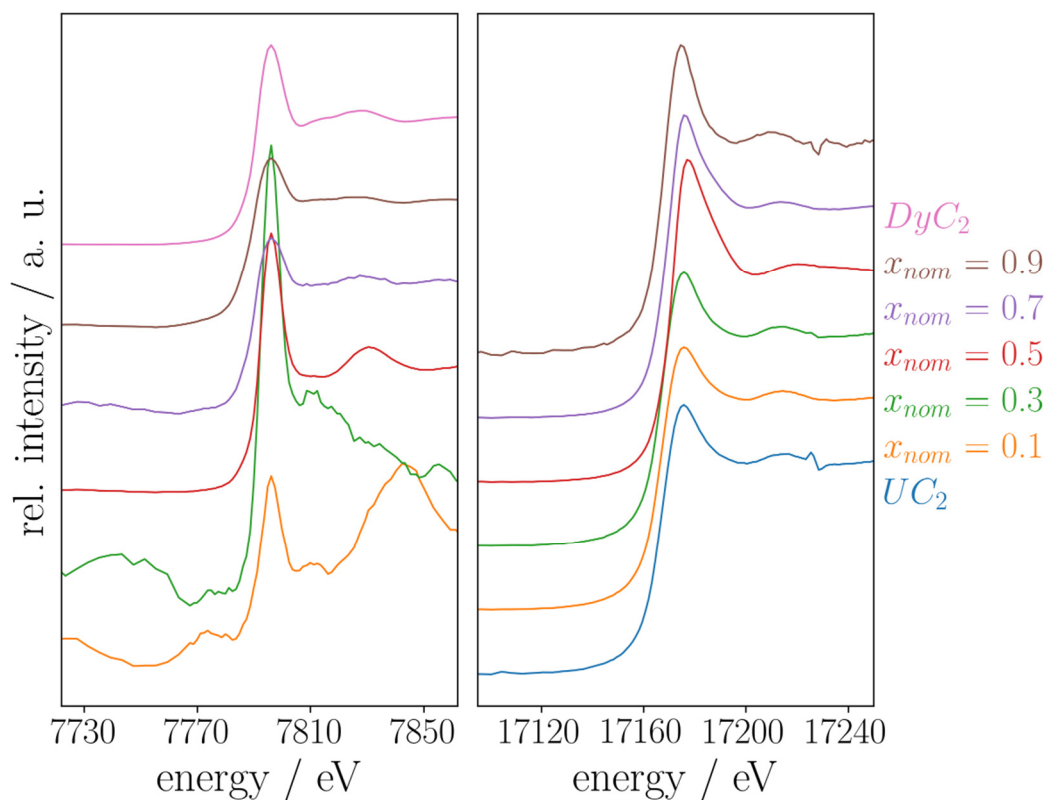

**Figure S7.1.** XANES spectra of  $\text{Dy}_x\text{U}_{1-x}\text{C}_2$  at the Dy- $L_{III}$  (left) and U- $L_{III}$  edge (right).

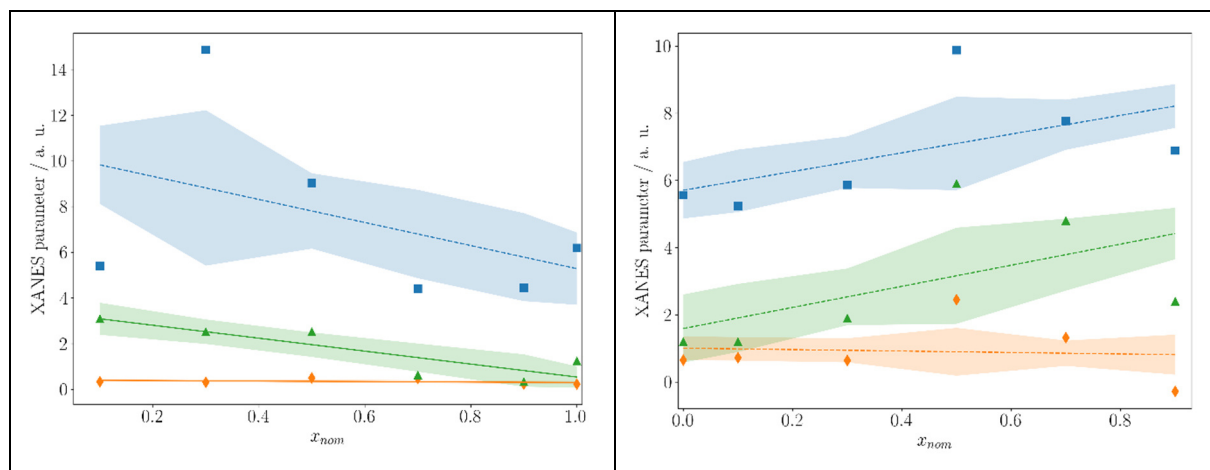

**Figure S7.2.** Graphical summary of the results of the XANES spectra of  $\text{Dy}_x\text{U}_{1-x}\text{C}_2$  at the Dy- $L_{III}$  (left) and U- $L_{III}$  edge (right); blue: area of white line ( $A_{WL}$ ), green: energy of white line ( $E_{WL}$ ), orange: energy of absorption edge ( $E_0$ ). The shaded areas correspond to confidence intervals of 68 %.

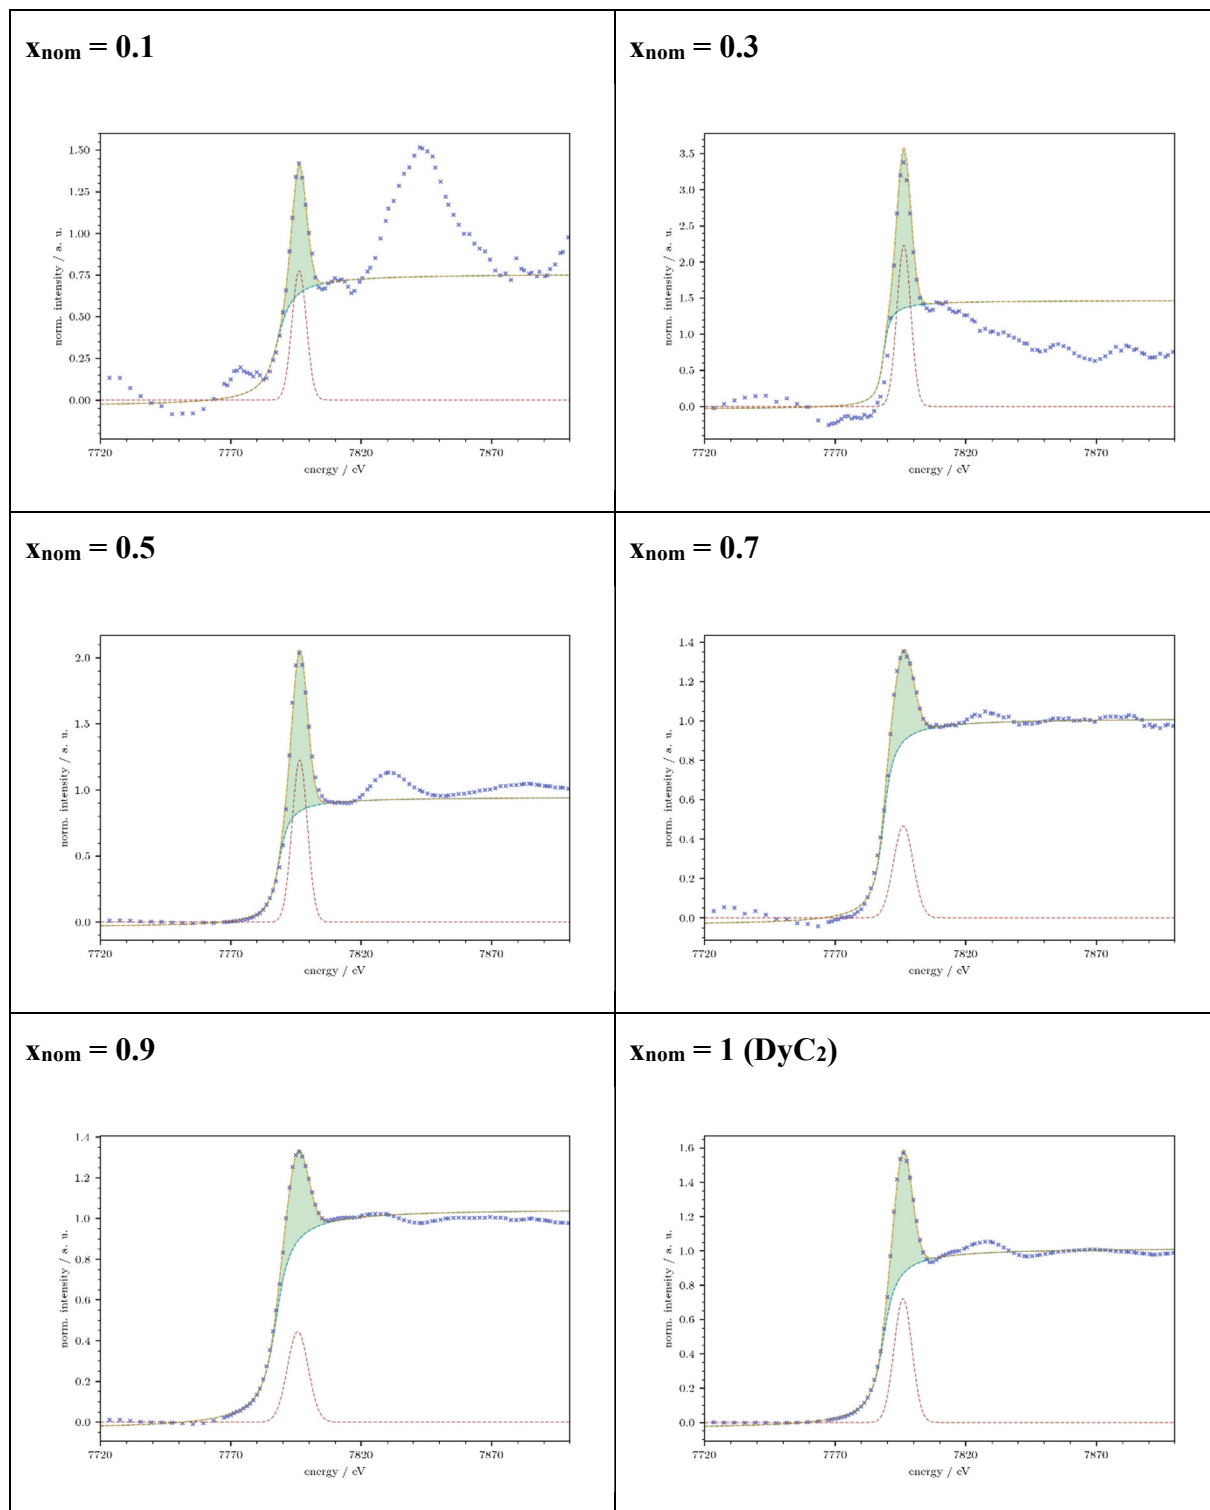

**Figure S7.3.** Fits of the XANES spectra of Dy<sub>x</sub>U<sub>1-x</sub>C<sub>2</sub> at the Dy-L<sub>III</sub> edge.

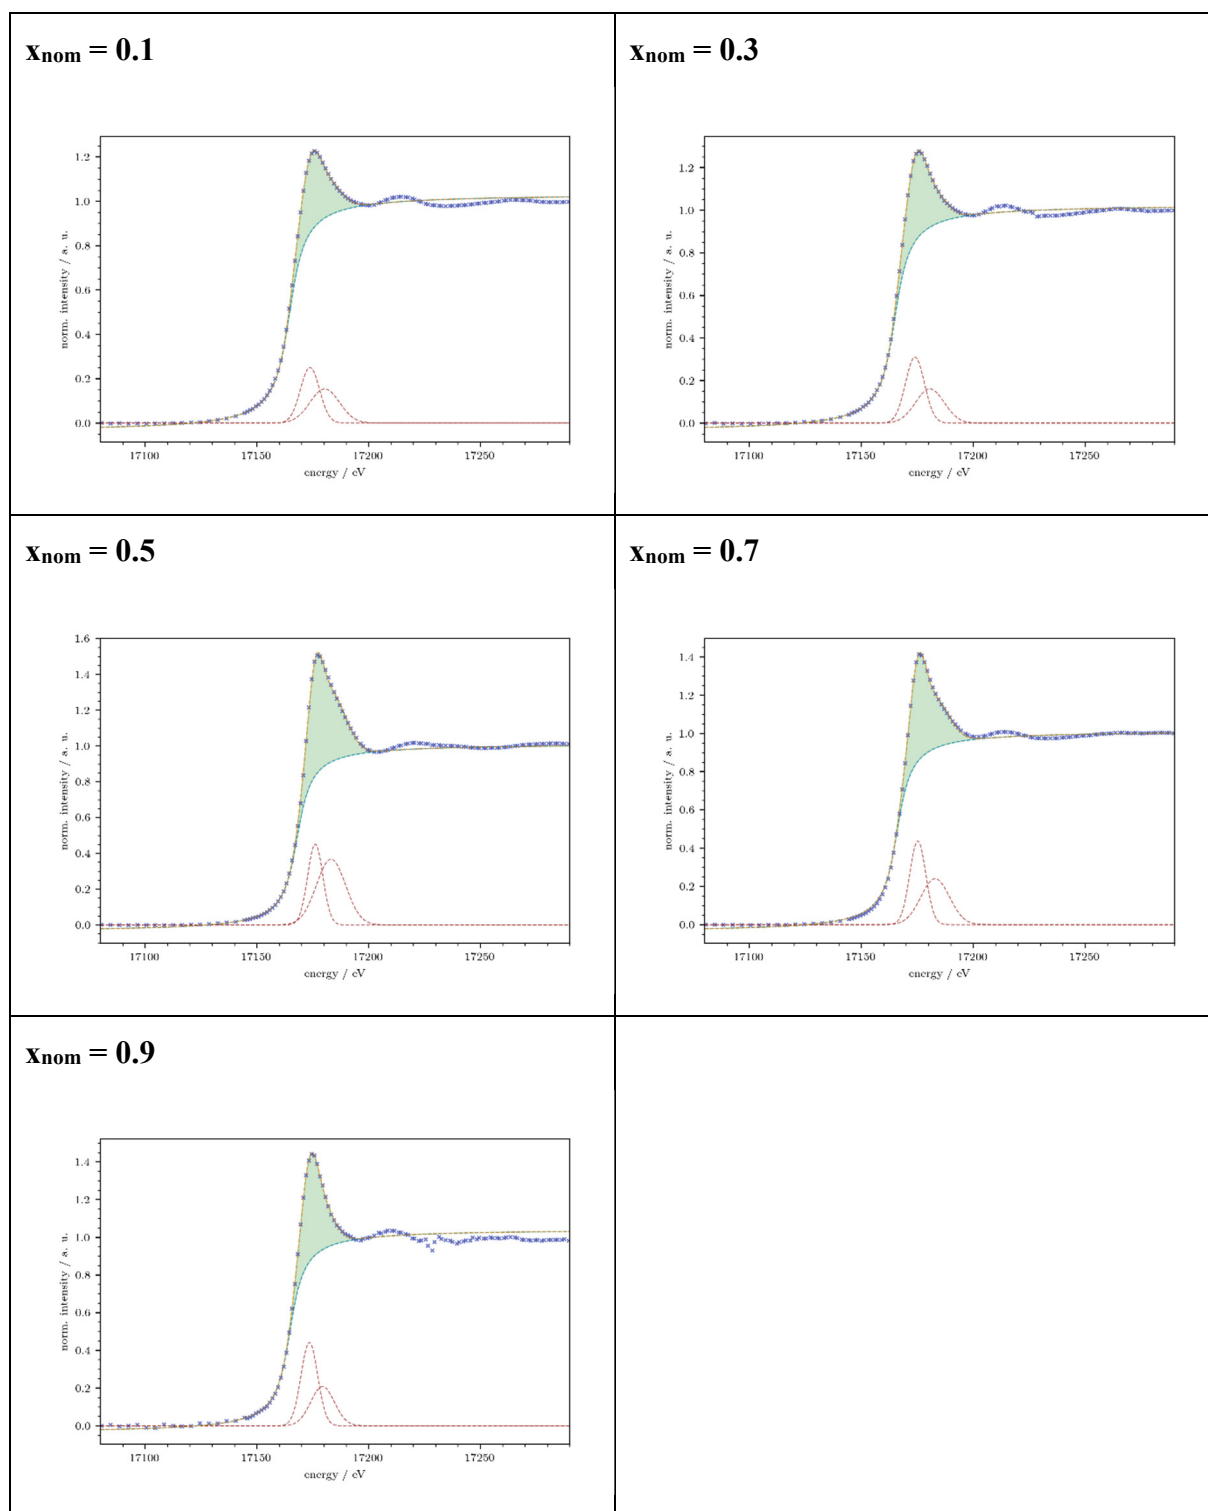

**Figure S7.4.** Fits of the XANES spectra of  $\text{Dy}_x\text{U}_{1-x}\text{C}_2$  at the U- $L_{III}$  edge;  $x = 0$  ( $\text{UC}_2$ ) see Figure S6.4.

**Table S8.** Summary of results of XANES spectra of  $\text{Ho}_x\text{U}_{1-x}\text{C}_2$ .

| $x_{\text{nom}} / \%$ | $x(\text{EDX}) / \%$ | $A_{WL} / \text{a.u.}$ |              | $E_{WL} / \text{eV}$ |              | $E_0 / \text{eV}$ |              |
|-----------------------|----------------------|------------------------|--------------|----------------------|--------------|-------------------|--------------|
|                       |                      | Ho- $L_{III}$          | U- $L_{III}$ | Ho- $L_{III}$        | U- $L_{III}$ | Ho- $L_{III}$     | U- $L_{III}$ |
| <b>0</b>              | 0                    | -                      | 5.56         | -                    | 17175.65     | -                 | 17167.2      |
| <b>10</b>             | 4.3(3)               | (28.0)                 | 5.73         | 8076.98              | 17175.76     | 8073.63           | 17167.8      |
| <b>30</b>             | 24.3(3)              | 14.1                   | 5.60         | 8077.06              | 17175.59     | 8073.25           | 17168.2      |
| <b>50</b>             | 45.5(4)              | 8.5                    | 6.20         | 8077.18              | 17175.36     | 8072.85           | 17168.2      |
| <b>70</b>             | 66.4(3)              | 9.04                   | 6.56         | 8078.25              | 17175.10     | 8072.98           | 17168.2      |
| <b>90</b>             | 90.7(2)              | 6.46                   | 7.81         | 8077.44              | 17174.83     | 8072.49           | 17168.7      |
| <b>100</b>            | 100                  | 2.57                   | -            | 8077.43              | -            | 8070.87           | -            |

Red: estimated errors.

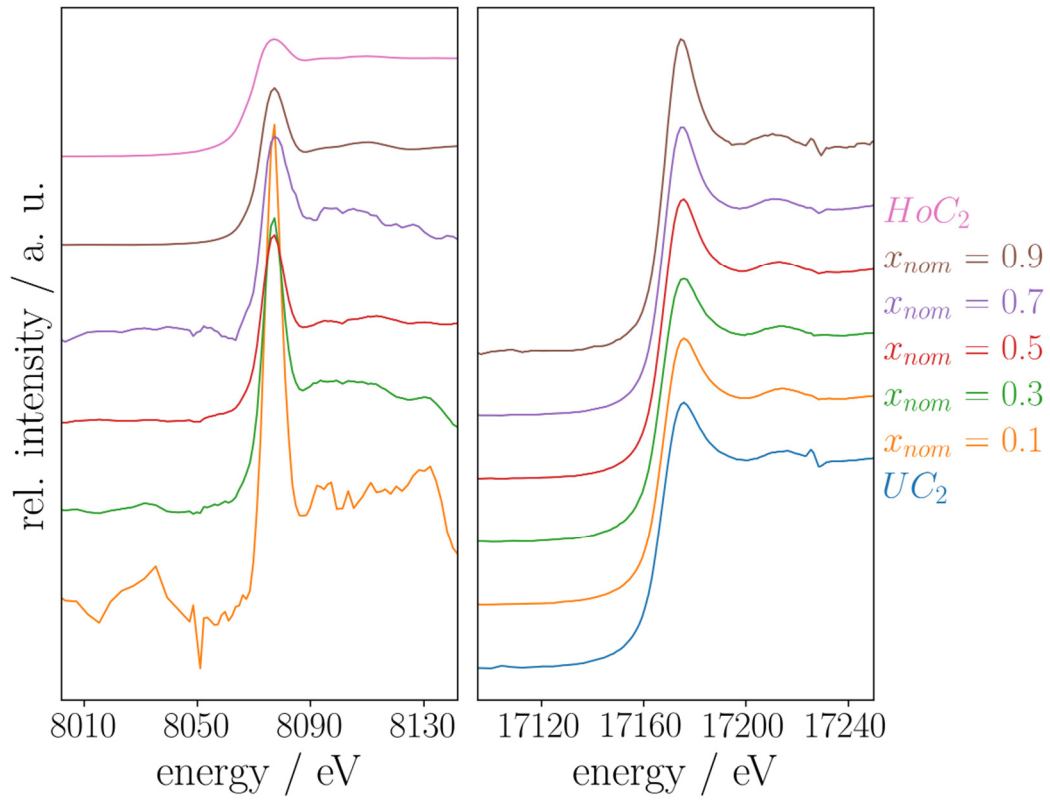

**Figure S8.1.** XANES spectra of  $\text{Ho}_x\text{U}_{1-x}\text{C}_2$  at the Ho- $L_{III}$  (left) and U- $L_{III}$  edge (right).

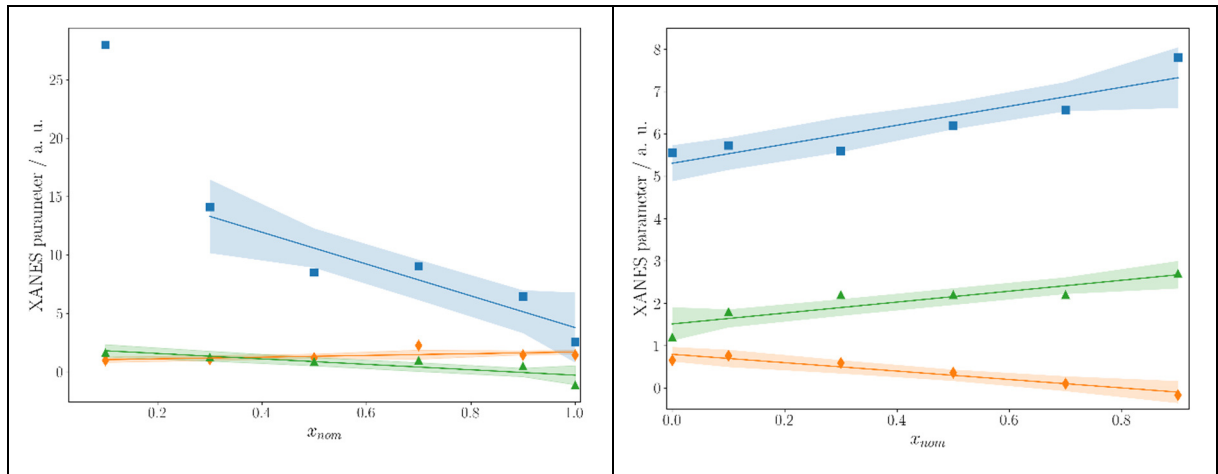

**Figure S8.2.** Graphical summary of the results of the XANES spectra of  $\text{Ho}_x\text{U}_{1-x}\text{C}_2$  at the Ho- $L_{III}$  (left) and U- $L_{III}$  edge (right); blue: area of white line ( $A_{WL}$ ), green: energy of white line ( $E_{WL}$ ), orange: energy of absorption edge ( $E_0$ ). The shaded areas correspond to confidence intervals of 68 %.

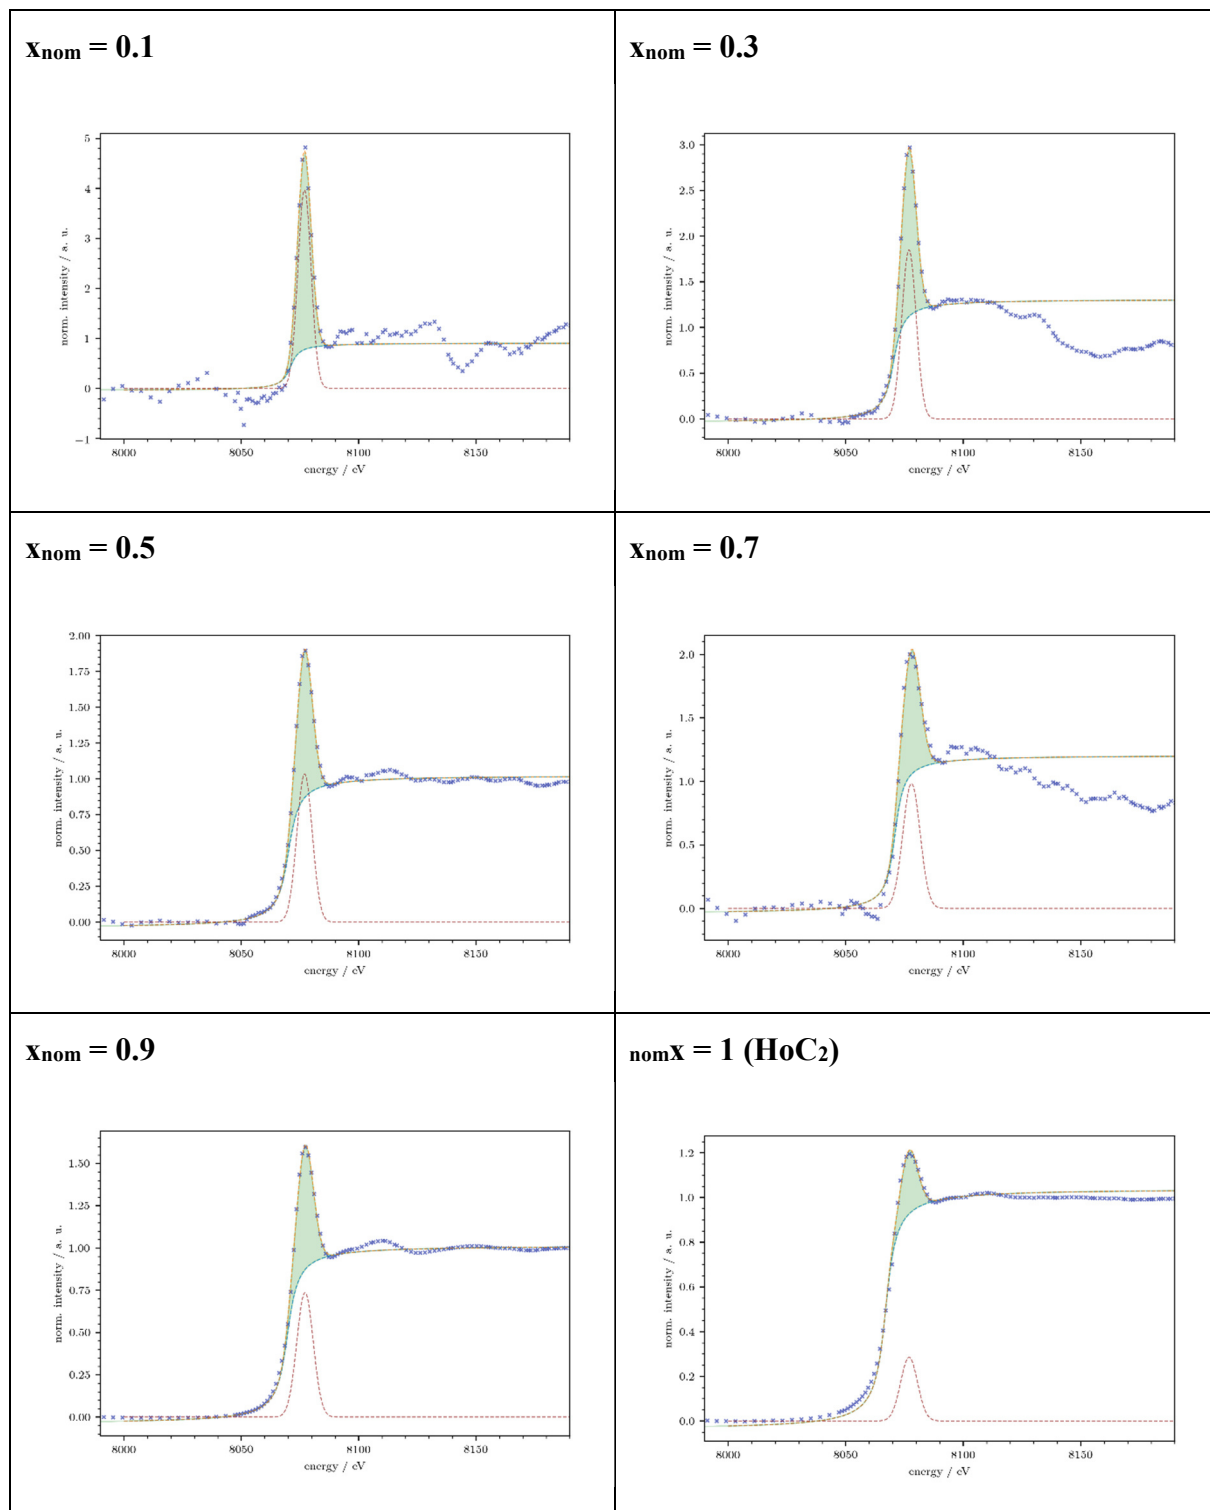

**Figure S8.3.** Fits of the XANES spectra of Ho<sub>x</sub>U<sub>1-x</sub>C<sub>2</sub> at the Ho-L<sub>III</sub> edge.



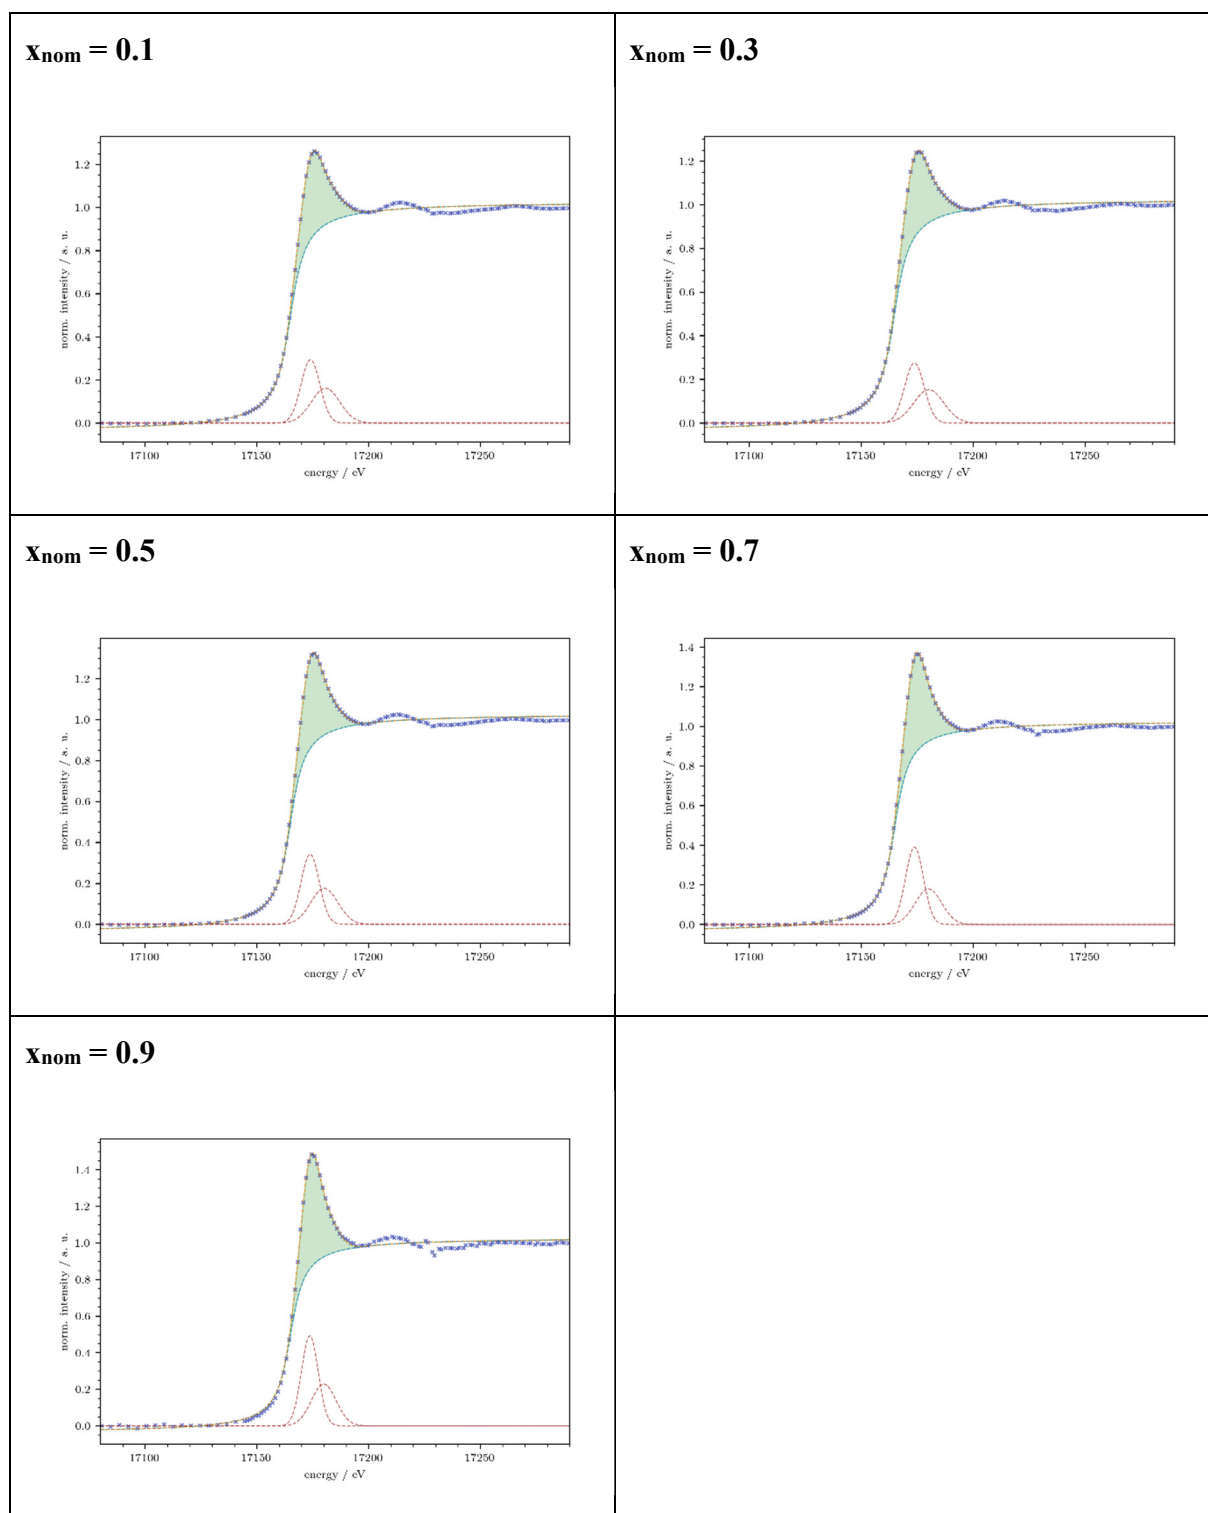

**Figure S8.4.** Fits of the XANES spectra of  $\text{Ho}_x\text{U}_{1-x}\text{C}_2$  at the U- $L_{III}$  edge;  $x = 0$  ( $\text{UC}_2$ ) see Figure S6.4.

**Table S9.** Summary of results of XANES spectra of  $\text{Tm}_x\text{U}_{1-x}\text{C}_2$ .

| $x_{\text{nom}} / \%$ | $x(\text{EDX}) / \%$ | $A_{WL} / \text{a.u.}$         |                               | $E_{WL} / \text{eV}$           |                               | $E_0 / \text{eV}$              |                               |
|-----------------------|----------------------|--------------------------------|-------------------------------|--------------------------------|-------------------------------|--------------------------------|-------------------------------|
|                       |                      | <b>Tm-<math>L_{III}</math></b> | <b>U-<math>L_{III}</math></b> | <b>Tm-<math>L_{III}</math></b> | <b>U-<math>L_{III}</math></b> | <b>Tm-<math>L_{III}</math></b> | <b>U-<math>L_{III}</math></b> |
| <b>0</b>              | 0                    | -                              | 5.56                          | -                              | 17175.65                      | -                              | 17167.2                       |
| <b>10</b>             | 4.6(8)               | 8.61                           | 5.39                          | 8655.41                        | 17175.77                      | 8651.93                        | 17167.2                       |
| <b>30</b>             | 24.3(12)             | 5.80                           | 5.56                          | 8655.08                        | 17175.67                      | 8650.72                        | 17167.4                       |
| <b>50</b>             | 40.5(11)             | 11.23                          | 6.77                          | 8655.61                        | 17175.48                      | 8651.65                        | 17168.9                       |
| <b>70</b>             | 69.8(13)             | 5.10                           | 6.37                          | 8655.53                        | 17175.79                      | 8649.69                        | 17168.7                       |
| <b>90</b>             | 90.6(2)              | 3.80                           | 6.94                          | 8655.59                        | 17175.40                      | 8649.02                        | 17169.2                       |
| <b>100</b>            | 100                  | 3.64                           | -                             | 8655.54                        | -                             | 8648.94                        | -                             |

**Red:** estimated errors.

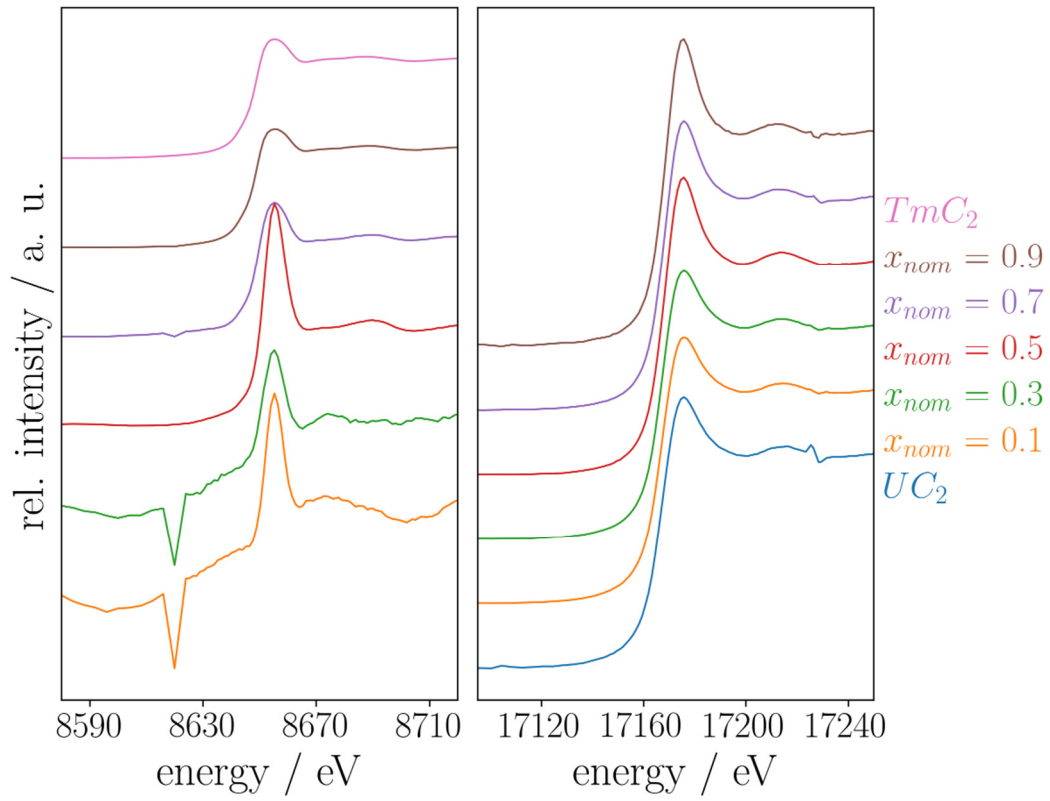

**Figure S9.1.** XANES spectra of  $\text{Tm}_x\text{U}_{1-x}\text{C}_2$  at the Tm- $L_{III}$  (left) and U- $L_{III}$  edge (right).

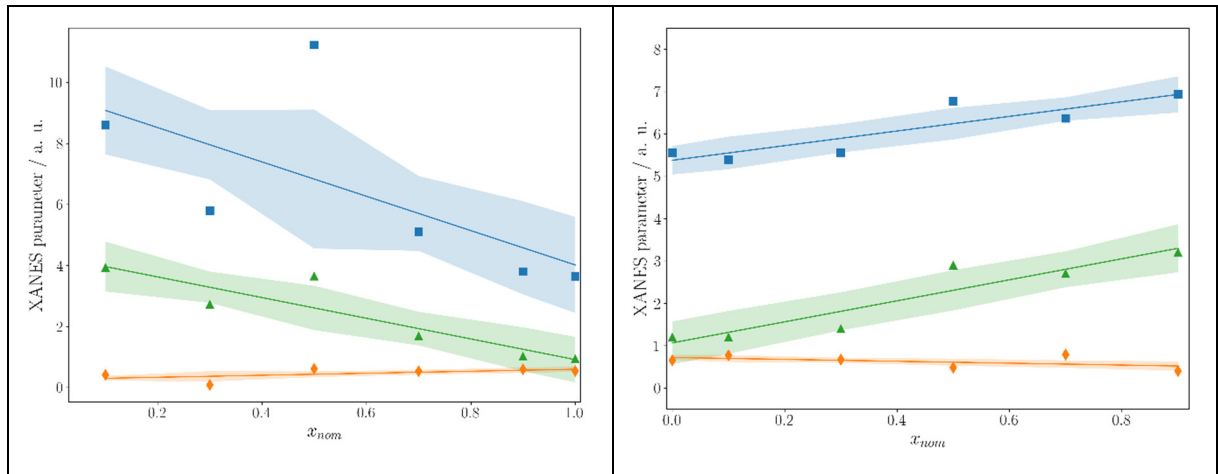

**Figure S9.2.** Graphical summary of the results of the XANES spectra of  $\text{Tm}_x\text{U}_{1-x}\text{C}_2$  at the Tm- $L_{III}$  (left) and U- $L_{III}$  edge (right); blue: area of white line ( $A_{WL}$ ), green: energy of white line ( $E_{WL}$ ), orange: energy of absorption edge ( $E_0$ ). The shaded areas correspond to confidence intervals of 68 %.

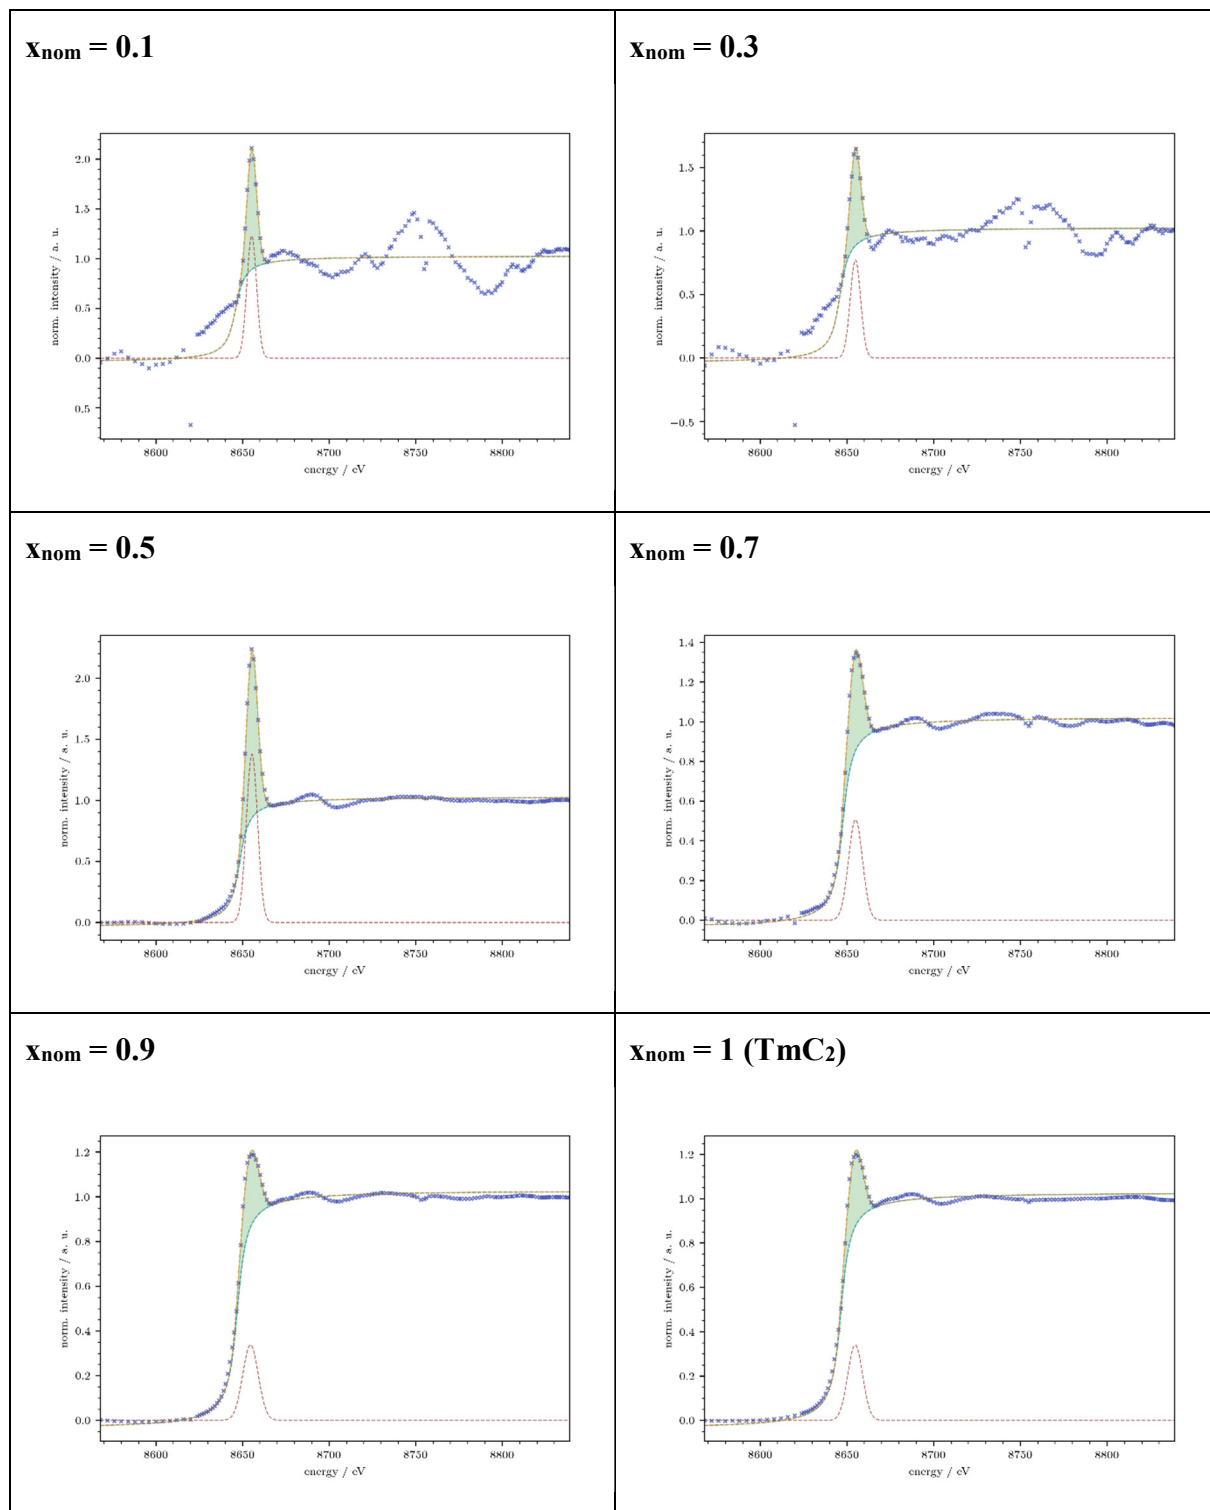

**Figure S9.3.** Fits of the XANES spectra of Tm<sub>x</sub>U<sub>1-x</sub>C<sub>2</sub> at the Tm-*L*<sub>III</sub> edge.

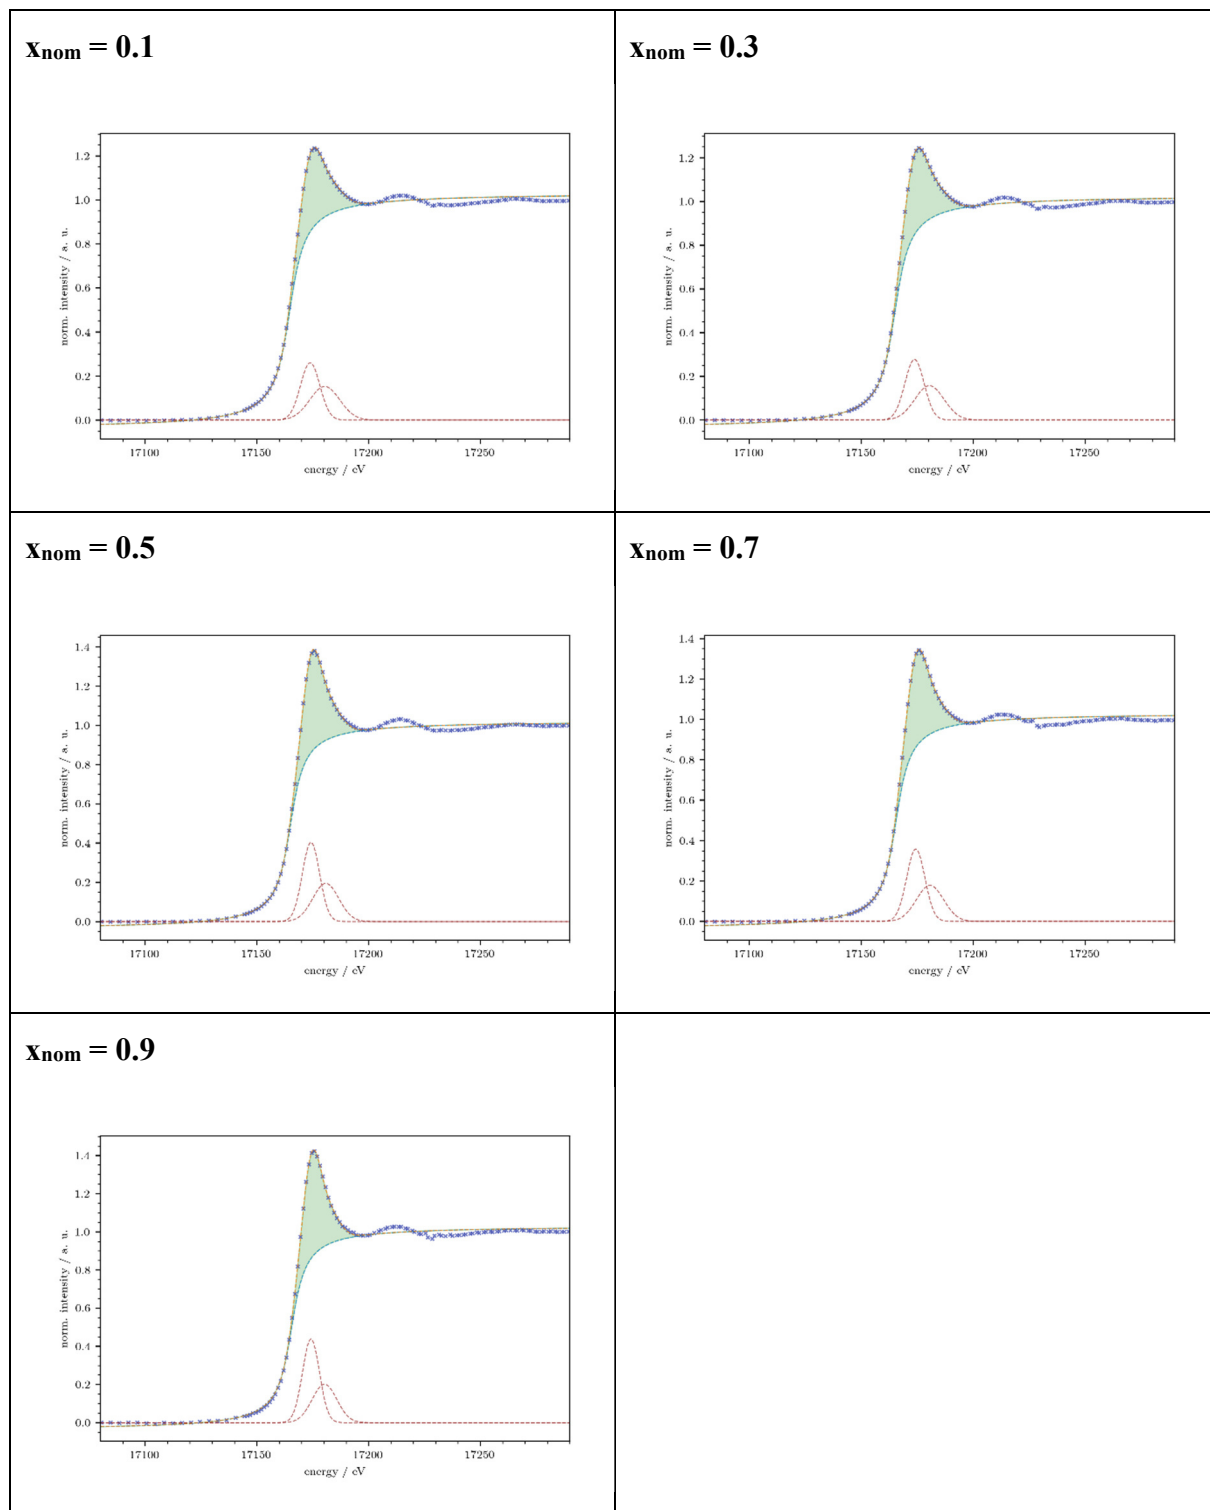

**Figure S9.4.** Fits of the XANES spectra of  $\text{Tm}_x\text{U}_{1-x}\text{C}_2$  at the U- $L_{III}$  edge;  $x = 0$  ( $\text{UC}_2$ ) see Figure S6.4.

**Table S10.** Summary of results of XANES spectra of  $\text{Lu}_x\text{U}_{1-x}\text{C}_2$ .

| $x_{\text{nom}} / \%$                          | $A_{WL} / \text{a.u.}$         |                               | $E_{WL} / \text{eV}$           |                               | $E_0 / \text{eV}$              |                               |
|------------------------------------------------|--------------------------------|-------------------------------|--------------------------------|-------------------------------|--------------------------------|-------------------------------|
|                                                | <b>Lu-<math>L_{III}</math></b> | <b>U-<math>L_{III}</math></b> | <b>Lu-<math>L_{III}</math></b> | <b>U-<math>L_{III}</math></b> | <b>Lu-<math>L_{III}</math></b> | <b>U-<math>L_{III}</math></b> |
| <b>0</b>                                       | -                              | 5.56                          | -                              | 17175.65                      | -                              | 17167.2                       |
| <b>12.5</b>                                    | 9.06                           | 5.61                          | 9252.96                        | 17175.94                      | 9249.27                        | 17168.2                       |
| <b>25</b>                                      | 7.82                           | 5.21                          | 9252.94                        | 17175.86                      | 9248.78                        | 17167.0                       |
| <b>50</b>                                      | 6.24                           | 5.83                          | 9252.86                        | 17175.69                      | 9247.86                        | 17167.8                       |
| <b>75</b>                                      | 5.00                           | 6.77                          | 9252.88                        | 17175.62                      | 9247.40                        | 17168.9                       |
| <b>87.5</b>                                    | 2.63                           | 7.42                          | 9253.00                        | 17175.48                      | 9245.69                        | 17168.8                       |
| <b>100 (Lu<math>_4</math>C<math>_7</math>)</b> | 4.10                           | -                             | 9252.87                        | -                             | 9245.40                        | -                             |

**Red:** estimated errors.

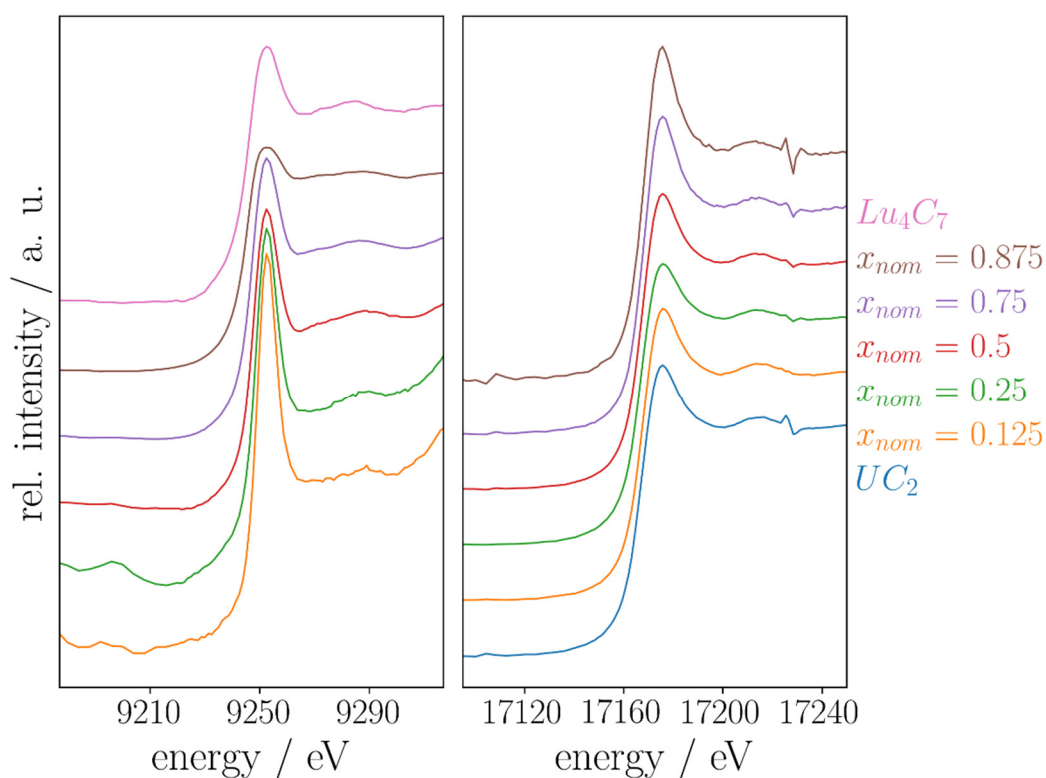

**Figure S10.1.** XANES spectra of  $\text{Lu}_x\text{U}_{1-x}\text{C}_2$  at the  $\text{Lu-L}_{III}$  (left) and  $\text{U-L}_{III}$  edge (right).

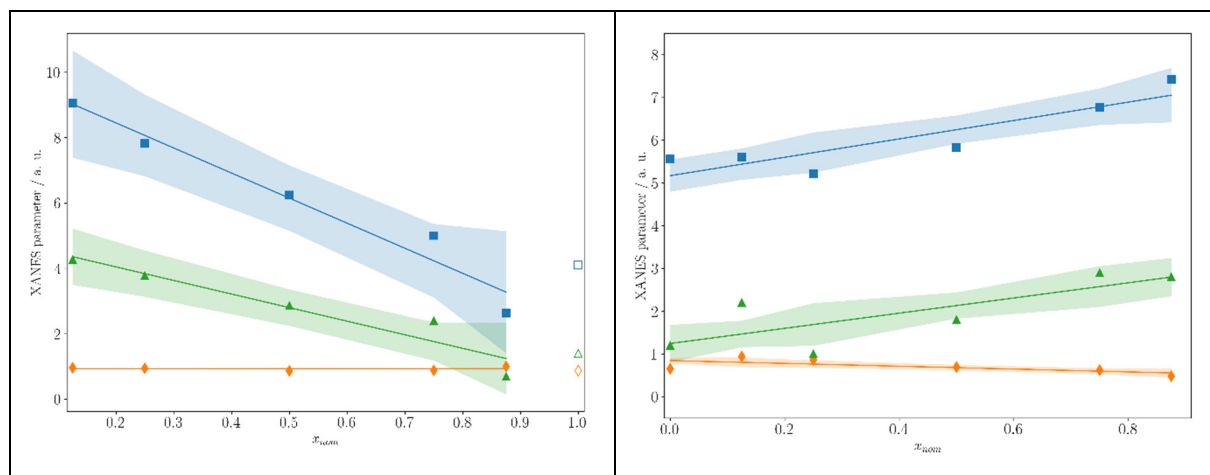

**Figure S10.2.** Graphical summary of the results of the XANES spectra of  $\text{Lu}_x\text{U}_{1-x}\text{C}_2$  at the  $\text{Lu-L}_{III}$  (left) and  $\text{U-L}_{III}$  edge (right); blue: area of white line ( $A_{WL}$ ), green: energy of white line ( $E_{WL}$ ), orange: energy of absorption edge ( $E_0$ ). The shaded areas correspond to confidence intervals of 68 %.

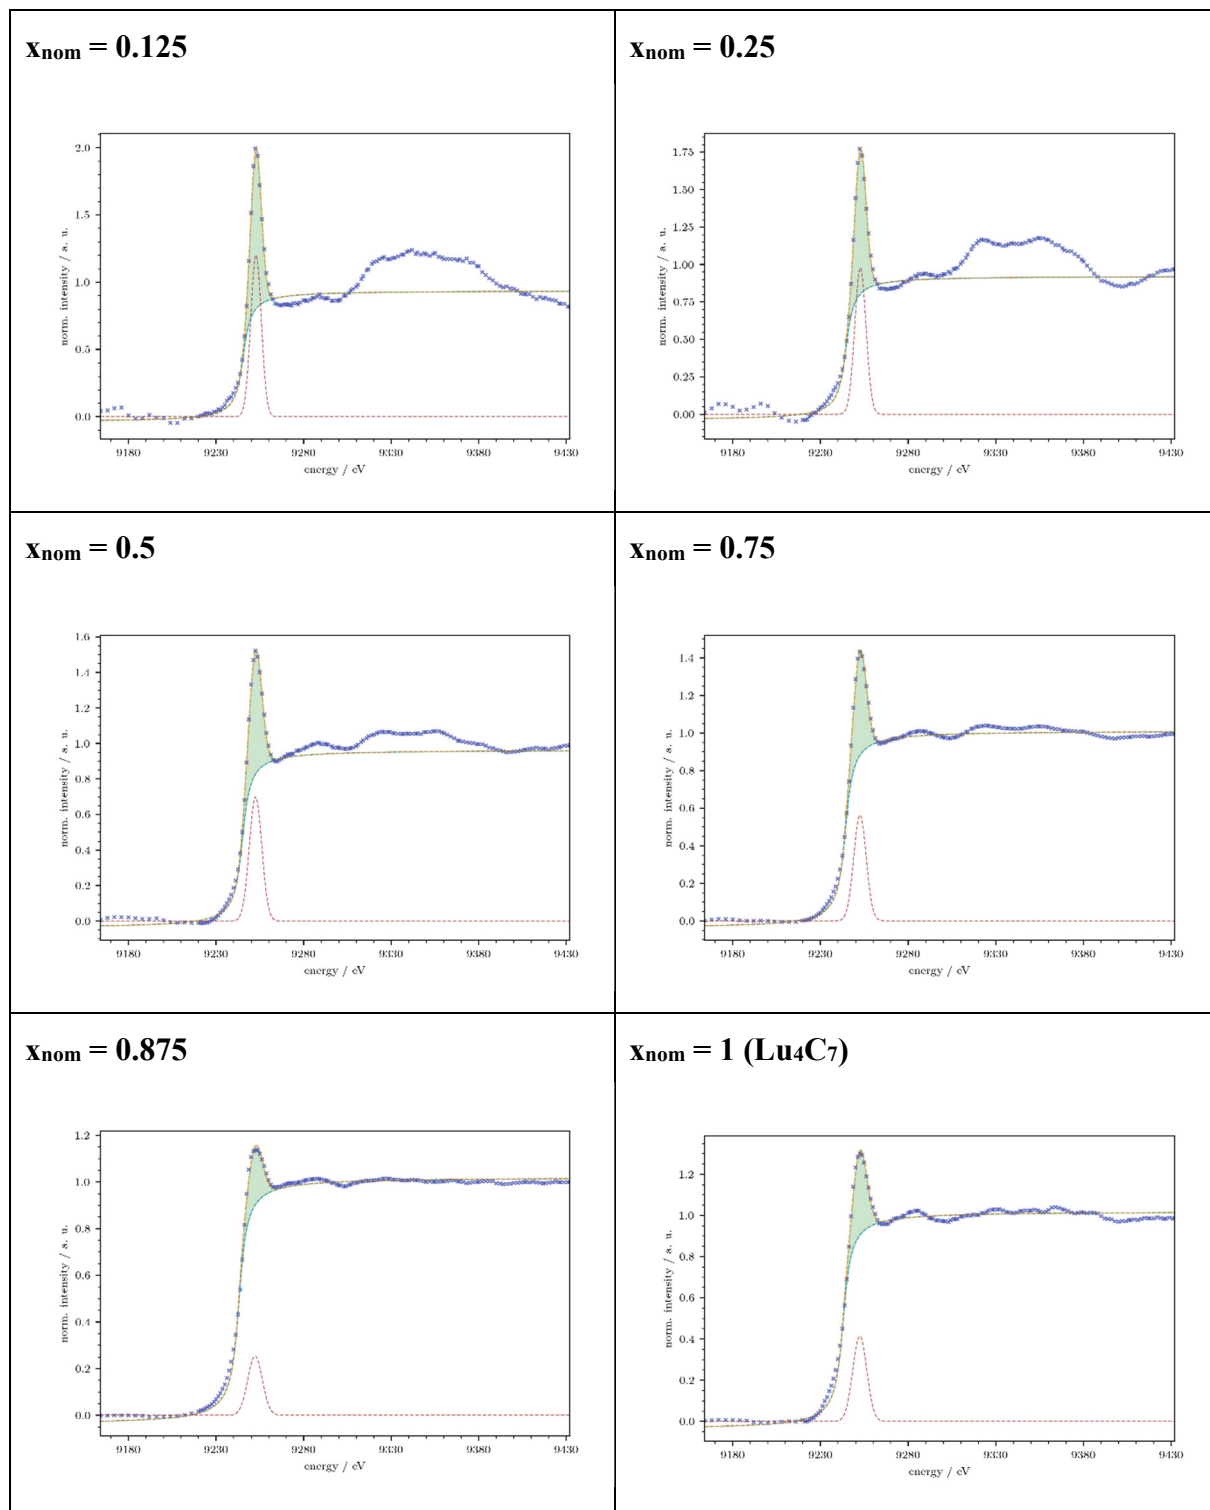

**Figure S10.3.** Fits of the XANES spectra of Lu<sub>x</sub>U<sub>1-x</sub>C<sub>2</sub> at the Lu-L<sub>III</sub> edge.



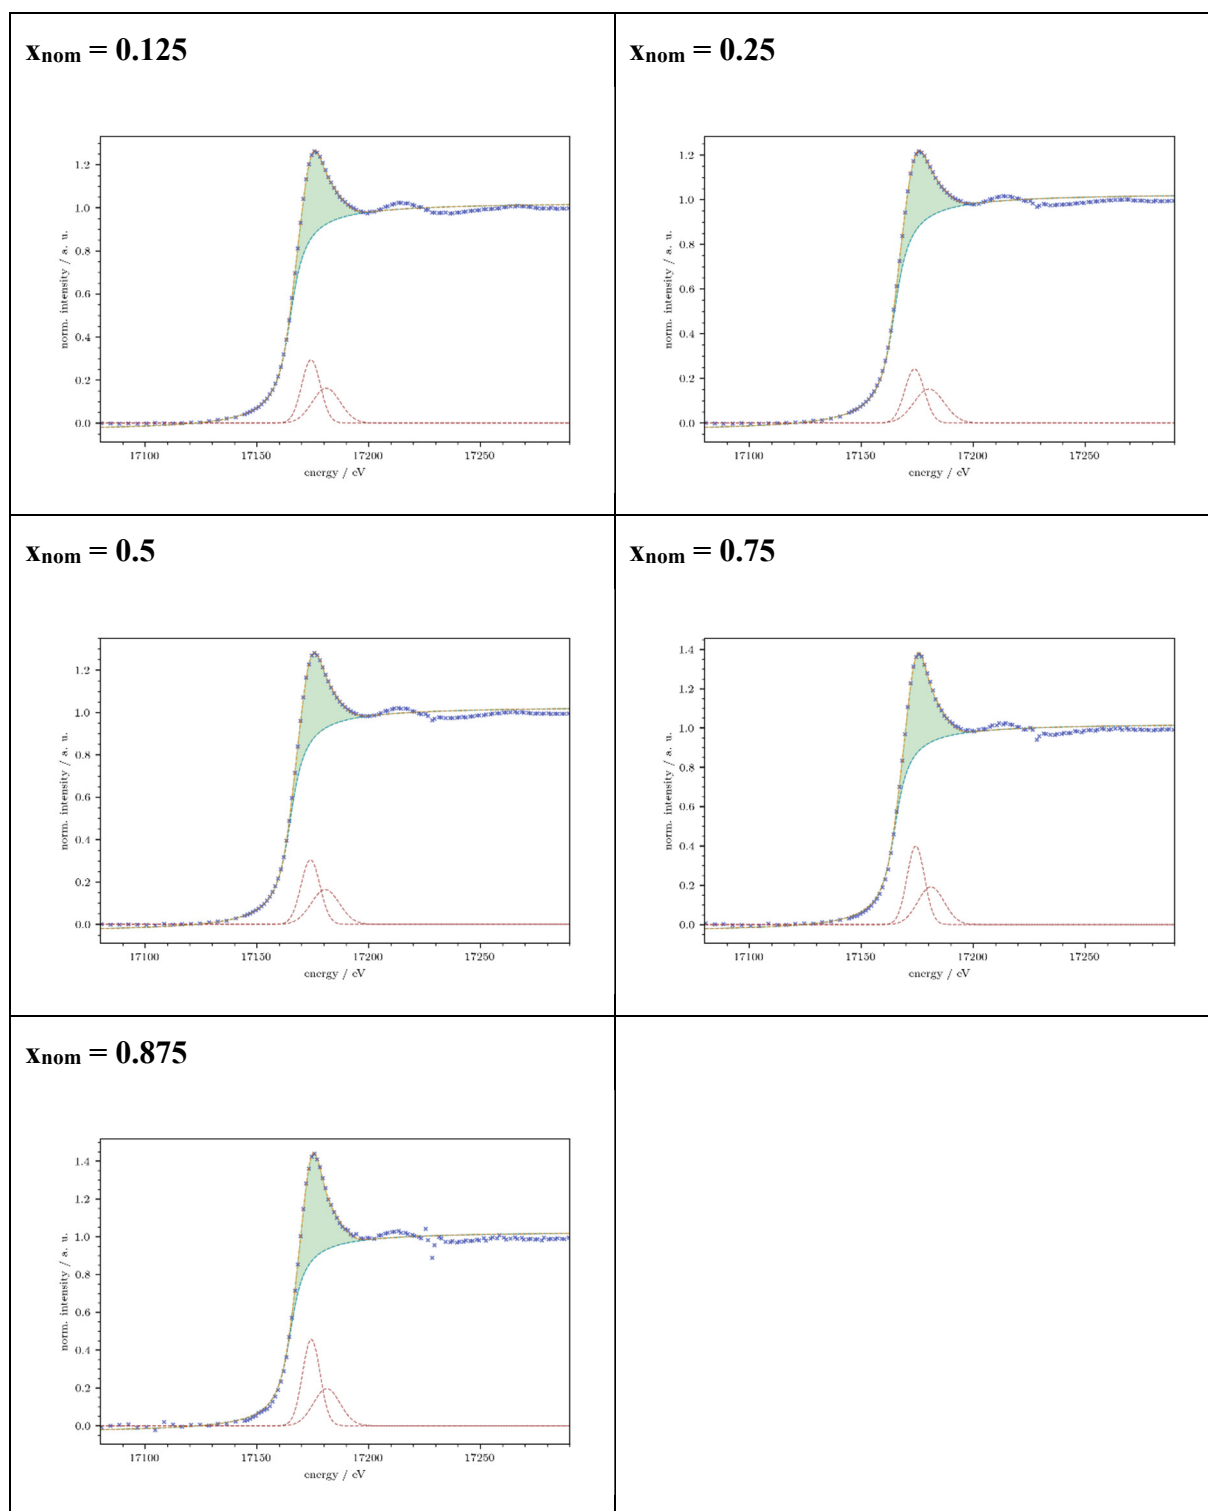

**Figure S10.4.** Fits of the XANES spectra of  $\text{Lu}_x\text{U}_{1-x}\text{C}_2$  at the U- $L_{III}$  edge;  $x = 0$  ( $\text{UC}_2$ ) see Figure S6.4.
